# Supplementary material for: Magnify is a universal molecular anchoring strategy for expansion microscopy
Source: PubMed Central journal article supplement (PMC10264239; doi:10.1038/s41587-022-01546-1), 2023-01-02
Supplement: 41587_2022_1546_MOESM1_ESM.pdf [file 41587_2022_1546_MOESM1_ESM.pdf]

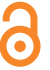

---

# Magnify is a universal molecular anchoring strategy for expansion microscopy

---

In the format provided by the authors and unedited

1 **Magnify: A versatile 11-fold expansion microscopy technique with universal molecular**  
2 **retention**

3  
4 **Authors**

5 Aleksandra Klimas<sup>1±</sup>, Brendan R. Gallagher<sup>1±</sup>, Piyumi Wijesekara<sup>2</sup>, Sinda Fekir<sup>3,4</sup>, Emma F.  
6 DiBernardo<sup>1</sup>, Zhangyu Cheng<sup>1</sup>, Donna B. Stolz<sup>5</sup>, Franca Cambi<sup>6,7</sup>, Simon Watkins<sup>5</sup>, Steven L  
7 Brody<sup>8</sup>, Amjad Horani<sup>9,10</sup>, Alison L. Barth<sup>1</sup>, Christopher I. Moore<sup>3,4</sup>, Xi Ren<sup>2</sup>, Yongxin Zhao<sup>1+</sup>

8  
9 **Affiliations**

10 <sup>1</sup>Department of Biological Sciences, Carnegie Mellon University, Pittsburgh, Pennsylvania,  
11 USA. <sup>2</sup>Department of Biomedical Engineering, Carnegie Mellon University, Pittsburgh,  
12 Pennsylvania, USA. <sup>3</sup>Department of Neuroscience, Brown University, Providence, Rhode Island,  
13 USA. <sup>4</sup>Carney Institute for Brain Science, Brown University, Providence, Rhode Island, USA.  
14 <sup>5</sup>Department of Cell Biology, Center for Biologic Imaging, University of Pittsburgh, Pittsburgh,  
15 Pennsylvania. <sup>6</sup>Veterans Administration Pittsburgh, Pittsburgh, Pennsylvania. <sup>7</sup>Department of  
16 Neurology/PIND, University of Pittsburgh, Pittsburgh, Pennsylvania, USA. <sup>8</sup>Department of  
17 Medicine, Washington University School of Medicine, St. Louis, Missouri, United States.  
18 <sup>9</sup>Department of Pediatrics, Washington University School of Medicine, St. Louis, Missouri,  
19 United States. <sup>10</sup>Department of Cell Biology and Physiology, Washington University School of  
20 Medicine, St. Louis, Missouri, United States

21  
22 ±These authors contributed equally to this work  
23 Aleksandra Klimas, Brendan R. Gallagher

24  
25 <sup>+</sup>Correspondence to [yongxinz@andrew.cmu.edu](mailto:yongxinz@andrew.cmu.edu)  
26

27 **Contents**

28 Supplementary Notes ..... 4  
29 Supplementary Note 1: Exploration of Anchoring and Homogenization Buffers..... 4  
30 Supplementary Note 2: Exploration of Gel Chemistry ..... 5  
31 Supplementary Note 3: DNA FISH experiment on tissues homogenized in MAGNIFY gel 6  
32 Supplementary Note 4: Use of SOFI with MAGNIFY ..... 6  
33 Supplementary Note 5: Parameter free resolution estimation of MAGNIFY-SOFI ..... 6  
34 Supplementary Note 6: High-quality imaging of tubulin ultrastructure in cell culture..... 7  
35 Supplementary Figures ..... 9  
36 Supplementary Figure 1: The full workflow for MAGNIFY ..... 9  
37 Supplementary Figure 2: Comparison of anchoring, homogenization, and gelling strategies.  
38 ..... 11  
39 Supplementary Figure 3: Examples of Post Expansion Staining with MAGNIFY ..... 12

|    |                                                                                           |    |
|----|-------------------------------------------------------------------------------------------|----|
| 40 | Supplementary Figure 4: Exploration and characterization of MAGNIFY gel chemistry... 14   | 14 |
| 41 | Supplementary Figure 5: Overview of SOFI..... 17                                          | 17 |
| 42 | Supplementary Figure 6: Example images of tubulin structure in cell culture and cilia in  |    |
| 43 | human lung organoids..... 18                                                              | 18 |
| 44 | Supplementary Figure 7: Example images of MAGNIFY expansion of FFPE tissue. .... 20       | 20 |
| 45 | Supplementary Figure 8: DNA FISH with MAGNIFY using FFPE human tissue..... 21             | 21 |
| 46 | Supplementary Videos..... 23                                                              | 23 |
| 47 | Supplementary Video 1..... 23                                                             | 23 |
| 48 | Supplementary Video 2..... 23                                                             | 23 |
| 49 | Supplementary Video 3..... 23                                                             | 23 |
| 50 | Supplementary Video 4..... 23                                                             | 23 |
| 51 | Supplementary Video 5..... 23                                                             | 23 |
| 52 | Supplementary Video 6..... 23                                                             | 23 |
| 53 | Supplementary Video 7..... 23                                                             | 23 |
| 54 | Supplementary Video 8..... 23                                                             | 23 |
| 55 | Supplementary Video 9..... 23                                                             | 23 |
| 56 | Supplementary Tables..... 24                                                              | 24 |
| 57 | Supplementary Table 1: Condition optimization for different tissue types..... 24          | 24 |
| 58 | Supplementary Table 2: Protein Retention for tissues under different anchoring and        |    |
| 59 | homogenization conditions. .... 25                                                        | 25 |
| 60 | Supplementary Table 3: Lipid retention in mouse brain under different anchoring and       |    |
| 61 | homogenization conditions. .... 26                                                        | 26 |
| 62 | Supplementary Table 4: Validated Primary Antibodies and fluorescent labels for Pre and    |    |
| 63 | Post MAGNIFY Staining..... 26                                                             | 26 |
| 64 | Supplementary Table 5: Secondary antibodies used for pre- and post-MAGNIFY staining.      |    |
| 65 | ..... 27                                                                                  | 27 |
| 66 | Supplementary Table 6: Comparison of expansion factors for different hydrogel chemistries |    |
| 67 | for different tissue types..... 28                                                        | 28 |
| 68 | Supplementary Table 7: Exploration of different hydrogel chemistries and their respective |    |
| 69 | expansion factors of blank gels in water..... 28                                          | 28 |
| 70 | Supplementary Table 8: Gelling Conditions for MAGNIFY Gel. .... 29                        | 29 |
| 71 | Supplementary Table 9: Deformation testing of different gel chemistries..... 29           | 29 |
| 72 | Supplementary Table 10: Gelling Solution Recipe ..... 30                                  | 30 |
| 73 | Supplementary Table 11: List of Chemicals and Reagents ..... 31                           | 31 |
| 74 | Supplementary Table 12: DNA FISH probes design..... 32                                    | 32 |
| 75 | References..... 45                                                                        | 45 |

76  
77

78

## 79 **Supplementary Notes**

### 80 ***Supplementary Note 1: Exploration of Anchoring and Homogenization Buffers***

81 We gelled deparaffinized and antibody labeled FFPE kidney pieces with the MANGIFY  
82 monomer solution containing 0.05% (v/v) methacrolein (**Supplementary Fig. 2a**) allowing the  
83 samples to still be homogenized by proteinase K (ProK) digestion, which is typically used to  
84 ensure isotropic expansion in most ExM protocols.<sup>1,2</sup> To quantify protein retention (**Fig. 1e,f**;  
85 **Supplementary Fig. 2f**; **Supplementary Table 2**), we compared average fluorescence of N-  
86 Hydroxysuccinimide (NHS) ester-dye conjugates, which bind to primary amines, before and  
87 after processing with the MAGNIFY protocol. To compare to previous protocols, FFPE kidney  
88 samples were prepared following the modified expansion pathology (ExPath) protocol.<sup>1,3</sup> With  
89 this protocol, the samples were gelled in a monomer solution containing 15% (w/v) SA, 5%  
90 (w/v) AA, 0.1% (w/v) Bis, and 11.7% (w/v) NaCl along with 0.01% (w/v) 4HT, 0.2% (v/v)  
91 TEMED, and 0.2% (w/v) APS after overnight incubation with 0.05 mg/mL AcX. After  
92 homogenization with ProK digestion buffer (50 mM Tris (pH 8), 25 mM EDTA, 0.5% w/v  
93 TritonX, 0.8M NaCl, 2 units/mL ProK) for 3 hours at 60°C, only  $3.08 \pm 0.46\%$  s.e.m. ( $n = 9$   
94 technical replicates) of pre-expansion NHS fluorescence was observed (**Fig. 1e**). Meanwhile  
95 samples anchored with 0.05% (v/v) methacrolein using the MAGNIFY gel chemistry measured  
96  $14.54 \pm 1.07\%$  s.e.m. ( $n = 12$  technical replicates) of pre-expansion NHS fluorescence (**Fig. 1e**)  
97 when homogenized under the same conditions. Similarly, for PFA fixed mouse brain tissue  
98 anchored with 0.1% (v/v) methacrolein or 0.05 mg/mL AcX using the MAGNIFY gel chemistry  
99 measured  $6.19 \pm 0.34\%$  s.e.m. ( $n = 20$  technical replicates) and  $7.7\% \pm 0.41\%$  s.e.m. ( $n = 20$   
100 technical replicates), respectively, retained fluorescence after 2 hours homogenization with ProK  
101 (**Fig. 1e**; **Supplementary Table 2**). Additionally, lipid retention between the two conditions was  
102 comparable for PFA fixed mouse brain tissue (**Supplementary Fig. 2f**; **Supplementary Table**  
103 **3**), where lipid retention measured by retained fluorescence of DiD was  $18.13 \pm 0.44\%$  s.e.m. ( $n$   
104  $= 20$  technical replicates) and  $17.06 \pm 0.8\%$  s.e.m. ( $n = 20$  technical replicates) for 0.1% (v/v)  
105 methacrolein anchoring and AcX anchoring, respectively, after 2 hours homogenization with  
106 ProK. Lipid retention measurements are a comparison of the same lipophilic dye before and after  
107 expansion, and it is a measure of how much of the initial stain is still present after expansion.  
108 Therefore, if a particular structure is not stained by the lipophilic dye before expansion (such as  
109 the cell membrane) due to fixation, permeabilization, or other reasons, it cannot be revealed by  
110 MAGNIFY (**Supplementary Fig. 2e**).

111 To better preserve protein epitopes during expansion, we sought to replace the strong  
112 protease digestion of ProK. Protocols such as magnified analysis of the proteome (MAP)<sup>4</sup> utilize  
113 a non-enzymatic surfactant based tissue denaturing solution, but we found this to be  
114 incompatible with both AcX and methacrolein based anchoring (**Supplementary Fig. 2b**).  
115 Pulling from the ExPath<sup>1</sup> protocol and clearing protocols such as CUBIC,<sup>5</sup> we found that the  
116 addition of EDTA and urea, respectively, to a non-ionic surfactant based solution could  
117 adequately homogenize tissues and preserve biomolecules (**Supplementary Figure 2c**) while  
118 providing isotropic expansion. Indeed, both EDTA and urea were necessary to adequately  
119 homogenize samples anchored with methacrolein (**Supplementary Figure 2d**). Both AcX and  
120 methacrolein anchored FFPE kidney samples retained fluorescence after homogenizing using a  
121 non-ionic surfactant-based buffer (10% (w/v) SDS, 8M urea, 25 mM EDTA, 2x PBS pH 7.5 at  
122 RT) for 60 hours at 80 °C (**Fig. 1e**; **Supplementary Fig. 2f**). AcX anchored samples retained  
123  $2.94 \pm 0.57\%$  s.e.m. ( $n = 14$  technical replicates) NHS fluorescence which was comparable to the

124 ProK homogenized samples. Meanwhile, samples anchored with 0.05% (v/v) methacrolein  
125 retained  $13.63 \pm 1.86\%$  s.e.m. ( $n = 8$  technical replicates) under the same conditions. Similarly,  
126 PFA fixed mouse brain tissue retained  $48.44 \pm 1.49\%$  s.e.m. ( $n = 20$  technical replicates) and  
127  $12.82 \pm 0.77\%$  s.e.m. ( $n = 20$  technical replicates) NHS fluorescence for 0.1% methacrolein and  
128 AcX anchored samples, respectively, when homogenized for 4 and 8 hours, respectively, at 80°C  
129 (**Fig. 1e; Supplementary Table 2**). Under the same conditions, MAGNIFY showed improved  
130 lipid retention, where 0.1% (v/v) methacrolein anchored samples retained  $98.10 \pm 2.36\%$  s.e.m.  
131 ( $n = 30$  technical replicates) DiD fluorescence and AcX anchored samples retained  $74.50 \pm$   
132  $2.47\%$  s.e.m. ( $n = 20$  technical replicates) after homogenizing for 4 and 8 hours, respectively in  
133 hot surfactant (**Fig. 3a; Supplementary Fig. 2f; Supplementary Table 3**).

134 To improve biomolecule retention, we found that increasing the methacrolein to 0.25% (v/v)  
135 for FFPE kidney samples preserved  $58.54\% \pm 7.08\%$  s.e.m. ( $n = 14$  technical replicates) of the  
136 NHS signal after homogenization for 60 hours at 80 °C using a surfactant-based buffer  
137 (**Supplementary Fig. 2f**). Similar to methacrolein concentration, homogenization time was  
138 tissue-type dependent (**Supplementary Table 1**), where mechanically tougher and more heavily  
139 fixed tissues such as FFPE kidney took longer to homogenize compared to softer tissue such as  
140 PFA fixed mouse brain. We also found the expansion factor was dependent on methacrolein  
141 concentration, where both over and under anchoring led to smaller expansion factors  
142 (**Supplementary Fig. 4**) and the optimal methacrolein concentration was tissue-type dependent  
143 (**Supplementary Table 1**).

#### 144 *Supplementary Note 2: Exploration of Gel Chemistry*

145 To optimize gel chemistry, we first attempted to replicate the X10 protocol,<sup>6</sup> where N,N-  
146 dimethylacrylamide acid (DMAA) was used to obtain larger expansion factors. We first made a  
147 gelling solution of 26.7% (w/v) DMAA and 6.4% (w/v) SA was prepared in water. After  
148 dissolving, a 3.6% (w/v) stock solution of KPS was added to a final concentration 0.36% (w/v)  
149 KPS. After vortexing, TEMED (100% w/w) was added to a final concentration of 0.4% (v/v). To  
150 replicate ExPath gelling conditions, we chose to omit the nitrogen purging step. When applied to  
151 FFPE kidney pieces treated with AcX prior to gelling, incomplete expansion and non-isotropic  
152 expansion was observed in samples homogenized in a non-ionic surfactant-based buffer (10%  
153 (w/v) SDS, 8M urea, 25 mM EDTA, 2x PBS pH 7.5 at RT) for 60 hours at 80 °C  
154 (**Supplementary Fig. 2c**). Additionally, these tissue gels were not mechanically sturdy and only  
155 had an expansion factor of ~6X when expanded in water (**Supplementary Table 6;**  
156 **Supplementary Fig. 4**).

157 To provide better expansion in a sturdy gel, we chose to supplement the ExPath gelling  
158 solution with a small amount of DMAA. To find the optimal gel composition, we varied DMAA,  
159 (SA, N,N'-Methylenebisacrylamide (Bis), and acrylamide (AA) concentrations and prepared  
160 blank gels and compared their expansion in water. From the rapid ExPath protocol, we knew  
161 increasing SA and AA concentrations provided a sturdier gel to compensate for the lower Bis  
162 concentration, which increased the expansion factor.<sup>3</sup> We ultimately found a hydrogel formula  
163 composed of 4% (w/v) DMAA, 34% (w/v) SA, 10% (w/v) AA, and 0.01% (w/v) Bis  
164 (**Supplementary Table 7**) provided the optimal expansion factor and sturdiness to expand an  
165 array of tissue types. We also varied the initiator, ammonium persulfate (APS), and inhibitor, 4-  
166 hydroxy-TEMPO (4HT), concentrations and polymerized the blank gels at different temperatures  
167 and found that a slightly higher APS concentration and slightly lower 4HT concentration  
168 compared to the ExPath protocol in gels polymerized at 37 °C provided the best expansion factor  
169 (**Supplementary Table 8**). It should also be noted the blank gel expansion factors are slightly

170 smaller than that of the tissue-gel hydrogel due to different components contributed to the  
171 hydrogel by the tissue.

172 To test the mechanical sturdiness of the gel, we compared the MAGNIFY gel chemistry to  
173 other gels using the method developed for the Ten-fold Robust Expansion Microscopy (TReX)  
174 protocol (**Supplementary Fig. 4, Supplementary Table 9**).<sup>7</sup> The TReX gel is comprised of 11%  
175 (w/v) SA, 14.5% (w/v) AA, 0.005-0.015% (w/v) Bis, and 1x PBS along with 0.15% (v/v)  
176 TEMED, and 0.15% (w/v) APS. Briefly, blank gels were made in a 2 mL Eppendorf tube and  
177 then cut into half cylinders. The gels were then expanded in water and the deformation index  
178 was calculated by taking the ratio of radius of deformation to the radius of the gel. For the TReX  
179 protocol, higher crosslinker concentrations (150 ppm Bis) compared to the reported values (50  
180 and 90 ppm Bis) were needed to produce a deformation index less than 0.5. Although both the  
181 high crosslinker TReX gel and MAGNIFY had similar expansion factors (5.9× in water),  
182 MAGNIFY had a much lower deformation index of 0.03 compared to the 0.28 deformation  
183 index of the high crosslinker TReX gel.

184 Interestingly, the crosslinking provided by the DMAA also had an anchoring effect; FFPE  
185 kidney samples anchored with 0% (v/v) methacrolein (**Supplementary Fig. 2c**) retained  $2.43 \pm$   
186  $0.83\%$  s.e.m. ( $n = 8$  technical replicates) and  $4.40 \pm 0.64\%$  s.e.m. when homogenized for 60  
187 hours at 80 °C using a surfactant-based buffer and with ProK homogenization using this gel  
188 chemistry.

#### 189 ***Supplementary Note 3: DNA FISH experiment on tissues homogenized in MAGNIFY gel***

190 We applied DNA FISH probes against telomere sequences<sup>8</sup> and centromere protein B box<sup>9</sup> to  
191 gel-embedded bladder cancer samples homogenized with strong ProK digestion, as ProK will  
192 homogenize proteins within tissue without damaging nucleic acids. We observed that these two  
193 probes diffused into MAGNIFY processed bladder cancer specimens and hybridized with  
194 chromosomal DNA within 2 hours at 37 °C and post-expansion lectin staining could still be  
195 performed (**Fig. 3m, Supplementary Video 5**). Using strong ProK digestion, we noticed that  
196 FFPE bladder cancer tissue section can be processed and stained with DNA FISH probes and  
197 lectin stain within 8 hours, which could be useful in time-sensitive applications such as those  
198 used for histopathological diagnoses.

#### 199 ***Supplementary Note 4: Use of SOFI with MAGNIFY***

200 We chose to pair MAGNIFY with SOFI as SOFI can work on standard fluorophores<sup>10</sup>  
201 images can be generated with under 100 time points<sup>10</sup>, and it has been shown to work on 3D  
202 datasets<sup>10,11</sup>. SOFI was performed on expanded samples with custom MATLAB code, where  
203 images were corrected for drift, intensity and deconvolved (Lucy-Richardson method). The SOFI  
204 processing used in MAGNIFY-SOFI is based on CryoSOFI code<sup>12</sup>, but only second-order cross-  
205 correlation was performed and the code was modified to function in 3D (Supplemental Fig. 6).  
206 We noted that the axial resolution improvement is limited as Z-planes were not captured  
207 simultaneously<sup>11</sup>.

#### 208 ***Supplementary Note 5: Parameter free resolution estimation of MAGNIFY-SOFI***

209 To determine the effective resolution achieved by MAGNIFY and MAGNIFY-SOFI, we  
210 applied a parameter-free algorithm based on decorrelation analysis to images of human lung  
211 organoid (Apical out airway organoids<sup>13</sup>, both normal and with CCDC39 gene mutations),  
212 expanded 10.5×. Organoids were stained with NHS-Cy3 and imaged using a CFI Plan  
213 Apochromat VC 60×C water immersion (1.2 NA), with a measured resolution of  $36.52 \pm 0.95$   
214  
215

216 nm (**Supplementary Fig. 5d**). Lucy-Richardson deconvolution was then performed on the  
217 dataset, improving the measured resolution to  $23.54 \pm 1.31$  nm. Finally, a resolution of  $15.90 \pm$   
218  $1.39$  nm was demonstrated on deconvolved MAGNIFY-SOFI images. Values are based on 37  
219 measurements in each condition across 4 technical replicates. Depending on the wavelength of  
220 fluorophore, assuming the expansion factor is consistent with this organoid example, the  
221 effective resolution of MAGNIFY-SOFI is estimated to be 13~18 nm.  
222

### 223 ***Supplementary Note 6: High-quality imaging of tubulin ultrastructure in cell culture.***

224 U2OS cells (Gifted from the Lee lab at Carnegie Mellon University, originally purchased  
225 from ATCC) were grown in DMEM supplemented with 10% fetal bovine serum, 4.5 g/L D-  
226 glucose, 110 mg/L sodium pyruvate, 6 mM L-glutamine, 0.1 mM non-essential amino acids, 50  
227 units/mL of penicillin and 50  $\mu$ g/mL of streptomycin. Cells were not authenticated or tested for  
228 mycoplasma contamination. All cells were maintained at 37°C in a humid 5% CO<sub>2</sub> atmosphere.  
229 Cells were seeded unto #1.5 cover glass treated with poly-l-lysine in a 6 well plate and grown for  
230 24-48 hours before fixation.

231 There is no standardized fixation protocol for super-resolution microtubule imaging, and  
232 thus this protocol requires optimization for new applications. The optimized protocol for high-  
233 quality tubulin images with MAGNIFY is based off existing protocols<sup>14-17</sup> and is as follows: 1  
234 hour before fixation, media was replaced with DMEM containing 0% FBS and the cells were  
235 returned to the 37°C incubator. After the 1 hour, we brought the well plate out to a RT bench top,  
236 aspirated the media, and quickly extracted the coverslips (< 30 s) with freshly made 37°C PEMT  
237 buffer (80 mM PIPES, 5 mM EGTA, 2 mM MgCl<sub>2</sub> at pH 6.8 with 0.2% TX). Quickly after we  
238 aspirated the PEMT buffer, we applied 2 ml of cold -20°C 100% methanol to each well, and then  
239 fixed the plate at -20°C for 5 minutes. We then replaced the methanol with RT 1x PBS and  
240 performed consecutive washes with PBS for 30 s, 1 min, 5 min, 10 min, and 15 min, using the 2-  
241 handed pipette technique to reduce mechanical stress and further dehydration.

242 MAGNIFY gel monomer solution was prepared as described in the methods section.  
243 Prior to gelation, methanol fixed U2OS cell samples were placed into custom gelling chamber  
244 consisting of four spacers cut from #1.5 cover glass adhered to the uncoated back of a  
245 microscope slide on either side of a piece of cover glass with adherent cells. Excess PBS around  
246 the specimen was absorbed with a Kimwipe and the specimen was allowed to air dry partially.  
247 Immediately prior to gelation, the chemicals APS, TEMED, and methacrolein were added to a  
248 final concentration of 0.25% (w/v) APS, 0.2% TEMED (w/v), and 0.1% (v/v) methacrolein. The  
249 solution was vortexed and applied to the U2OS cells. A glass slide was then placed on top of the  
250 double-stacked spacers to form a gelling chamber. The samples were incubated overnight in a  
251 humidified container at 37 °C to complete gelation.

252 After gelation, the glass slide cover was removed from the gelling chamber, blank gel  
253 surrounding the tissue was trimmed from the samples, and the U2OS cell containing hydrogel  
254 was cut into smaller pieces. Samples were then incubated in homogenization buffer (10% w/v  
255 SDS, 8M Urea, 25 mM EDTA, 2× PBS, pH 7.5 at RT) for 36h at 80 °C with shaking.  
256 Homogenized samples were then washed 3 times with 1× PBS at RT, followed by at least 3  
257 washes in 1% decaethylene glycol monododecyl ether (C<sub>12</sub>E<sub>10</sub>)/1xPBS or 1%PBST at RT or 60  
258 °C to remove remaining SDS.

259 After homogenization and washing, U2OS cells were stained with approximately 1  
260  $\mu$ g/mL of a combination of rabbit anti- $\alpha$ Tubulin (Abcam ab18251, Proteintech 80762-1-RR,  
261 11224-1-AP), rabbit anti- $\beta$ Tubulin (Proteintech 10094-1-AP), mouse anti- $\alpha$ Tubulin (Invitrogen



262 62204, Proteintech 66031-1-Ig), and mouse anti- $\beta$ Tubulin (Proteintech 66240-1-Ig, Sigma  
263 T8328) in staining buffer (5 $\times$  SSC (750 mM NaCl, 75 mM sodium citrate, pH 7.0)/0.1% Tween  
264 20) for 48h RT. Samples were then washed 3 times with washing buffer (1 $\times$ PBS/0.1%  
265 (C<sub>12</sub>E<sub>10</sub>)/1xPBS) at RT for at least 10 minutes. To prevent disassociation during full expansion in  
266 water, samples were stained with both fluorescently conjugated secondaries and biotin-  
267 streptavidin labeling. First, samples were incubated in staining buffer with AF488 AffiniPure  
268 Fab Fragment Donkey Anti-Rabbit (Jackson ImmunoResearch 711-547-003) , AF488 AffiniPure  
269 Fab Fragment Donkey Anti-Mouse (715-547-003), Biotin-SP AffiniPure Fab Fragment Goat  
270 Anti-Rabbit (111-067-003), and Biotin-SP AffiniPure Fab Fragment Goat Anti-Mouse (115-067-  
271 003) diluted to approximately 1  $\mu$ g/mL in staining buffer for at least 1 hour at RT. Samples were  
272 then washed at least 3 times with washing buffer for at least 10 minutes. Samples were then  
273 incubated with AF488 conjugated streptavidin (Invitrogen S11223) diluted to approximately 1  
274  $\mu$ g/mL in staining buffer for at least 20 minutes at RT. Samples were then washed at least 3  
275 times with washing buffer for at least 10 minutes. After staining, samples were washed in water  
276 for at least 10 minutes. This was repeated until the sample was fully expanded, at least three  
277 exchanges of water.

278

279

280

281

282

283 **Supplementary Figures**

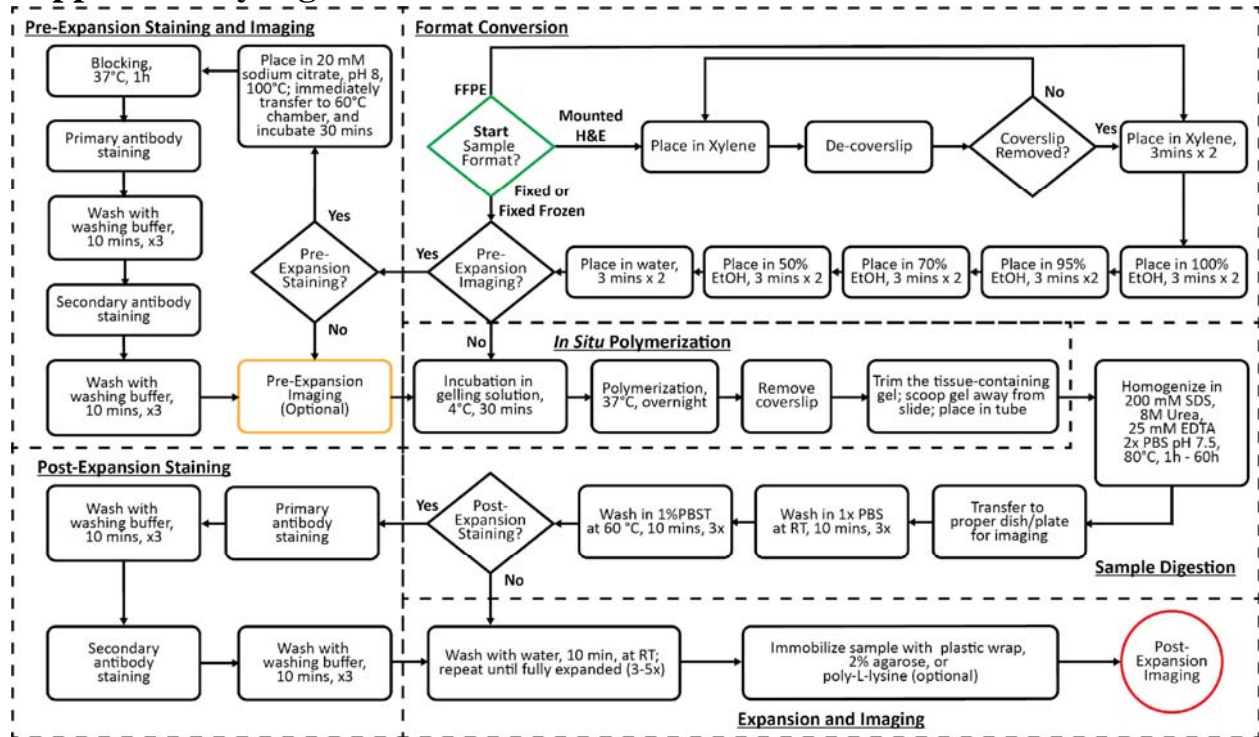

284  
285 **Supplementary Figure 1: The full workflow for MAGNIFY.**

286  
287

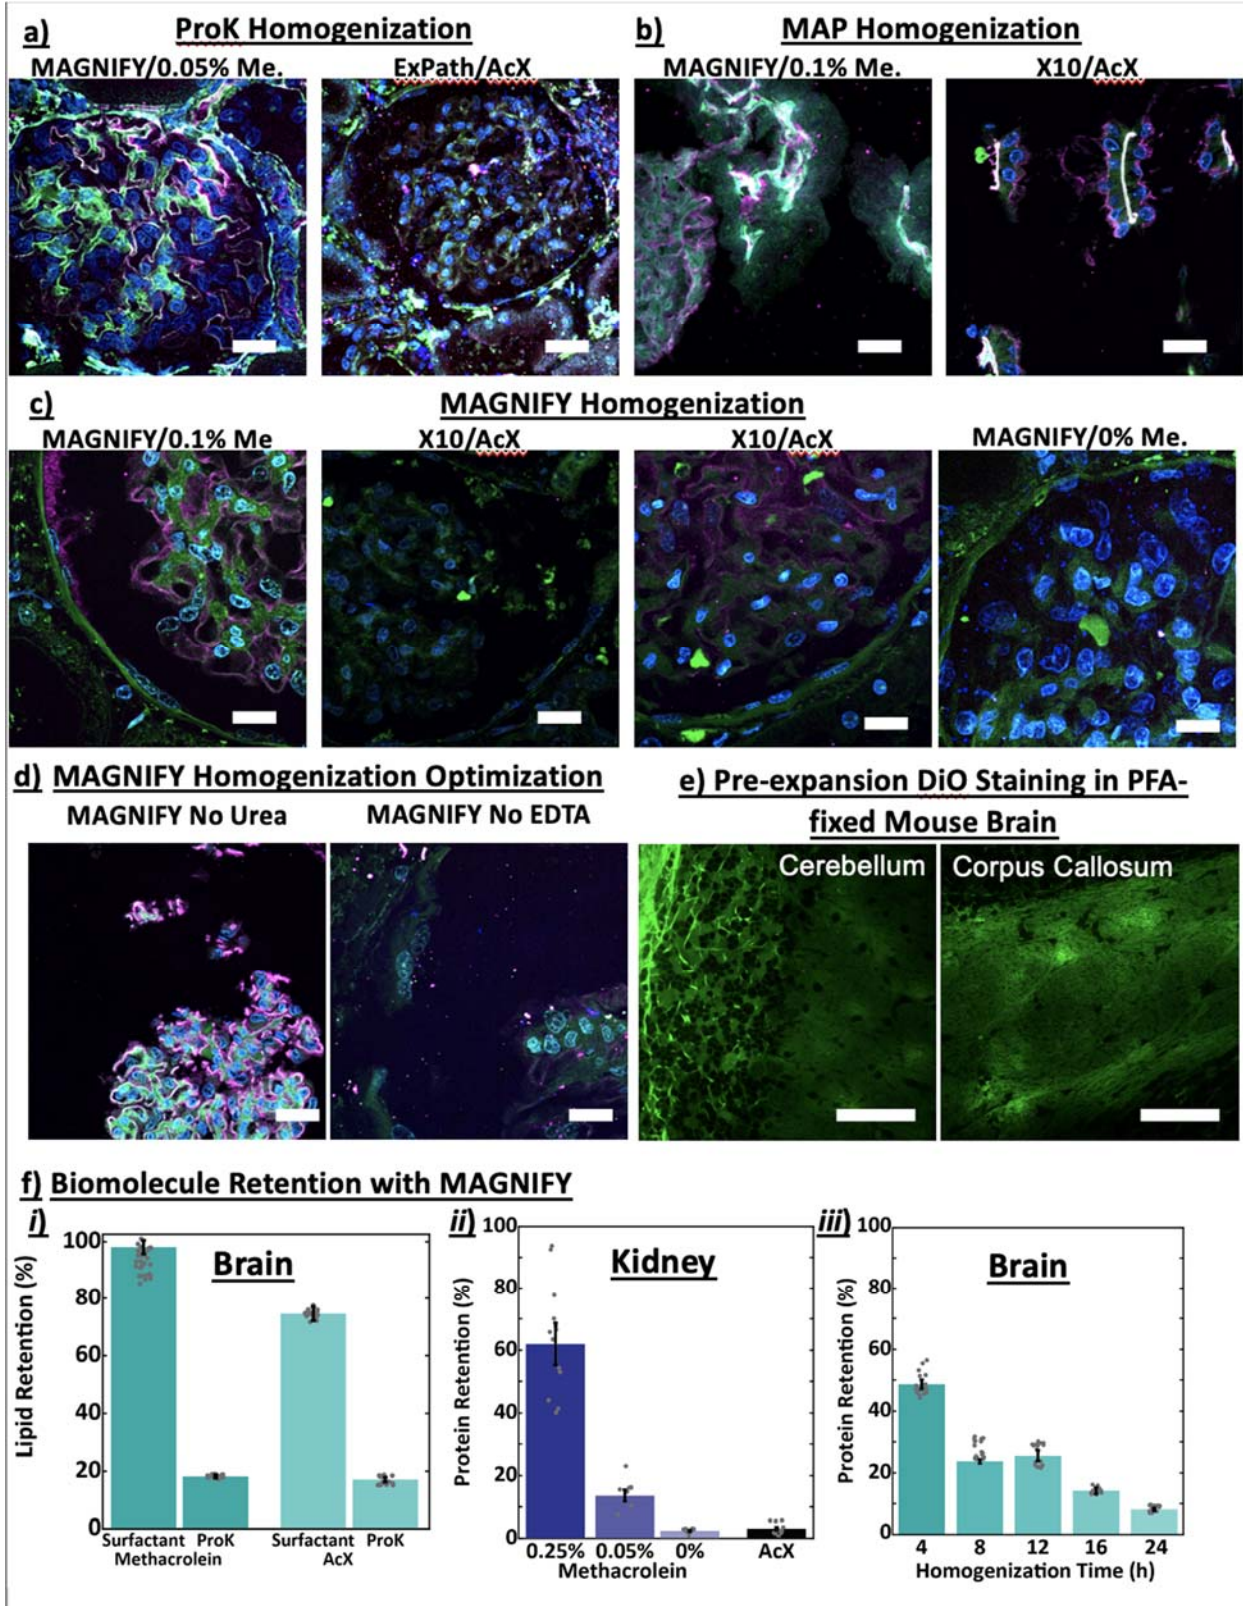

291 **Supplementary Figure 2: Comparison of anchoring, homogenization, and gelling strategies.**  
292 (a) Deparaffinized and stained FFPE kidney samples were gelled according to the MAGNIFY or  
293 ExPath protocols and were incubated in the ExPath homogenization buffer (50 mM Tris pH 8, 25  
294 mM EDTA, 0.5% w/v TritonX, 0.8M NaCl) with Proteinase K diluted by 1:200 (final  
295 concentration 4 units/mL) for 3 hours at 60 °C. Final expansion factors: 4.2 (MAGNIFY) and  
296 3.3 (ExPath). (b) Kidney samples prepared with the MAGNIFY protocol anchored with 0.1%  
297 (v/v) methacrolein, X10 protocol anchored with AcX, and the MAGNIFY protocol showed  
298 severe cracking due to incomplete homogenization when expanded in water after homogenizing  
299 for 60h at 80°C in the MAP homogenization buffer (200 mM SDS, 200 mM NaCl, and 50 mM  
300 Tris in water pH 9 at RT). (c) Samples prepared with the MAGNIFY protocol anchored with  
301 0.1% (v/v) methacrolein, ExPath protocol anchored with AcX, and the x10 protocol anchored  
302 with AcX could be expanded in water after homogenization using a non-ionic surfactant buffer  
303 (10% w/v SDS, 8M Urea, 25 mM EDTA, 2x PBS, pH 7.5 at RT) for 60h at 80°C. However, the  
304 x10 prepared samples had less even homogenization and smaller expansion compared to the  
305 MAGNIFY sample. Some anchoring is present in samples without an anchoring agent, most  
306 likely due to the crosslinking capability of DMAA. Optimal anchoring was observed in 0.25%  
307 (v/v) methacrolein anchored kidney samples. Expansion factors: 7.9 (MAGNIFY/0.1%Me.) and  
308 6.0 (X10). (d) When urea or EDTA were removed from the non-ionic surfactant buffer,  
309 insufficient homogenization led to incomplete expansion and severe cracking in FFPE kidney  
310 samples homogenized for 60h at 80°C. Gels were expanded in water and representative  
311 maximum intensity projection images were obtained at 10x magnification. Scale bar 100 μm  
312 (absolute scale) Blue DAPI, green NHS, magenta WGA. (e) Pre-expansion DiO staining in the  
313 cerebellum (left) and corpus callosum (right) in PFA-fixed mouse brain tissue showing strong  
314 myelin staining but no strong staining of the neuronal plasma membrane. Scale bar: 50 μm. (f)  
315 Protein and Lipid retention for mouse brain and human kidney. (i) Lipid retention measured as  
316 DiD fluorescence retention for mouse brain homogenized in surfactant versus ProK for tissues  
317 anchored with 0.1% methacrolein or AcX. N = 20 technical replicates. Error bars in terms of  
318 s.e.m. (ii) Protein retention of human kidney measured as NHS fluorescence retention processed  
319 with MAGNIFY versus ExPath and anchored with different conditions and homogenized in hot  
320 surfactant for 60 hours. N = 13, 8, 8, and 9 technical replicates. (iii) Protein retention of mouse  
321 brain measured as NHS fluorescence retention processed with MAGNIFY and anchored with  
322 0.1% methacrolein and homogenized in hot surfactant over time. N = 20 technical replicates.

323

324

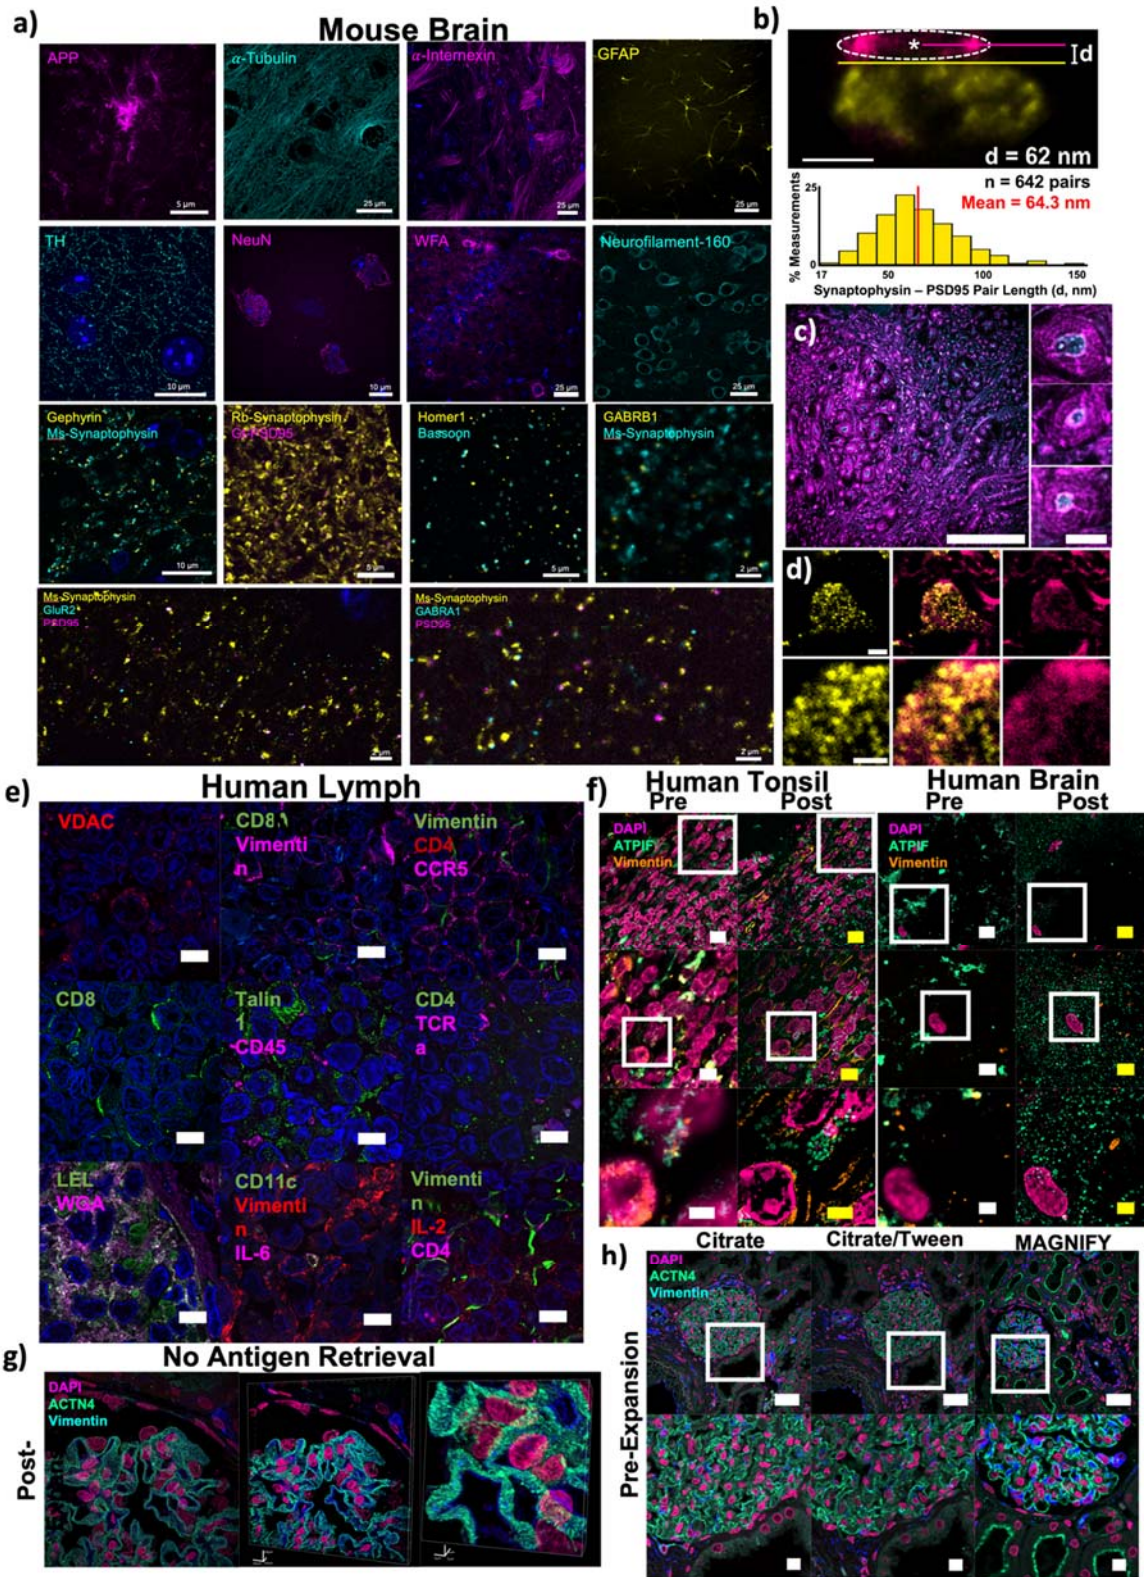

325

326 **Supplementary Figure 3: Examples of Post Expansion Staining with MAGNIFY (a)**  
 327 Paraformaldehyde-fixed 30µm mouse brain sections were gelled according to the MAGNIFY protocol  
 328 using 0.1%-1% (v/v) methacrolein and were homogenized using a non-ionic surfactant buffer (10% w/v

329 SDS, 8M Urea, 5-25 mM EDTA, 1-2x PBS, pH 7.5 at RT) for 4-8h at 80°C. After expansion, samples  
330 were stained with indicated primary antibodies in 1x PBS overnight. After washing, samples were stained  
331 with DAPI and relevant secondary antibodies. After staining, samples were washed in 1x PBS and  
332 imaged at 10x (APP, GFAP, WFA, Neurofilament-160) or 40x ( $\alpha$ -Tubulin,  $\alpha$ -Internexin, TH, NeuN, all  
333 synaptic markers) magnification. Blue, DAPI. **(b)** Quantification of synaptophysin-PSD95 pair distances  
334 in mouse striatum expanded fully with MAGNIFY. Top: Example measurement. The distance,  $d$ , was  
335 taken from the edge of synaptophysin (yellow) to the center of the postsynaptic density (PSD95,  
336 magenta). Bottom: Summary of all measurements taken. Y-axis represents the number of measurements  
337 as a percentage of all measurements taken.  $n = 642$  measurements across two technical replicates. Mean  
338 pair distance = 64.3 nm. Expansion factor:  $11\times$  in ddH<sub>2</sub>O. **(c)** Visualization of myelinated axons in the  
339 mouse brain with MAGNIFY. Cyan: NHS-Cy3, Magenta: DiD. Scale bars: Overview: 10  $\mu\text{m}$ , Zoom-ins:  
340 1  $\mu\text{m}$ . **(d)** Lipophilic dye specificity for synaptic vesicles in the mouse brain. Left: synaptophysin, yellow.  
341 Right: DiD, magenta. Middle, merge. Bottom Row: Zoom-in of top row. Areas of high vesicle density (as  
342 shown by synaptophysin labeling) can be seen to be labeled with DiD as well. Scale bar top: 200nm;  
343 bottom: 100 nm. **(e)** Deparaffinized human lymph node samples purchased from US Biomax were gelled  
344 according to the MAGNIFY protocol using 0.1% (v/v) methacrolein and were homogenized using a non-  
345 ionic surfactant buffer (10% w/v SDS, 8M Urea, 5-25 mM EDTA, 1-2x PBS, pH 7.5 at RT) for 26-32h at  
346 80°C. After expansion, samples were stained with indicated primary antibodies in staining buffer  
347 overnight. After washing, samples were stained with DAPI and relevant secondary antibodies. After  
348 staining, samples were washed in 1xPBS and imaged at 40x magnification. Scale bar 50  $\mu\text{m}$  (absolute  
349 scale) Blue DAPI. **(f)** MAGNIFY improves post expansion staining. Human tonsil (left) and brain  
350 (right) FFPE samples were imaged at 40x (top left, scale bar 10  $\mu\text{m}$ , middle left scale bar 5 $\mu\text{m}$ , bottom  
351 left scale bar 2  $\mu\text{m}$ ). The white box indicates the field of view of the higher magnification images. The  
352 samples were then processed with the MAGNIFY protocol, and the same fields of view were imaged  
353 post-expansion in water at 10 $\times$  (top right, scale bar, 10  $\mu\text{m}$  biological scale) and 40x (middle right scale  
354 bar 5 $\mu\text{m}$ , bottom right scale bar 2  $\mu\text{m}$ ; biological scale). Post expansion images were projected over 4-17  
355 z slices. Expansion factors in water were: 8.04 $\times$  (tonsil), 8.36 $\times$  (brain). Staining of ATIPF and vimentin  
356 improve with post expansion staining. Magenta, DAPI; Green, ATPIF; Orange, Vimentin. **(g)** MAGNIFY  
357 does not require antigen retrieval. MAGNIFY protocol achieves good post expansion staining without the  
358 need for antigen retrieval pre-expansion. Scale bar 25  $\mu\text{m}$  (absolute scale). Foot processes in kidney  
359 podocytes can still be resolved. Magenta, DAPI; Green, ACTN4, Blue, Vimentin. **(h)** The MAGNIFY  
360 homogenization buffer can be used as a superior pre-expansion antigen retrieval buffer. After heat  
361 treatment for 30-45 minutes in 200 mM sodium citrate (pH 8), 200 mM sodium citrate, 0.05% tween (pH  
362 6.5), or 10% w/v SDS, 8M Urea, 25 mM EDTA, 2x PBS (pH 9.5), the MAGNIFY buffer demonstrates  
363 superior pre-expansion staining. Scale bar top: 50  $\mu\text{m}$ ; bottom: 10  $\mu\text{m}$ .

364

365

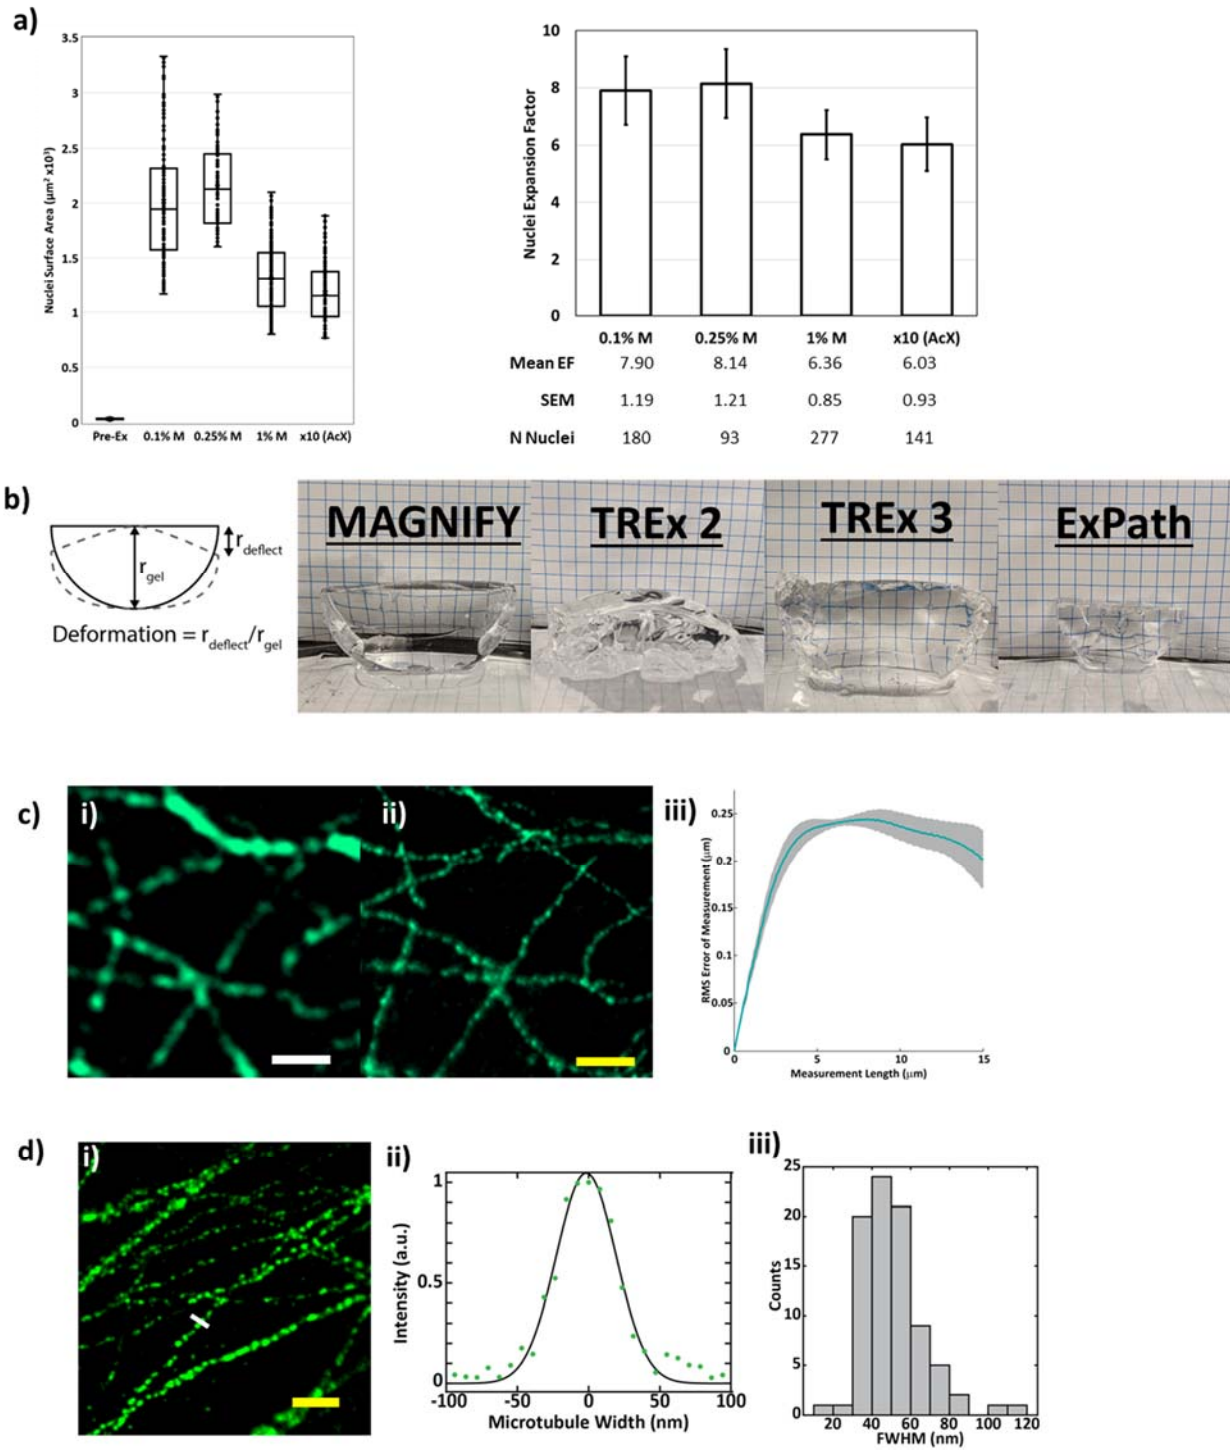

368 **Supplementary Figure 4: Exploration and characterization of MAGNIFY gel chemistry.** (a)  
 369 Estimation of Expansion Factors for Gelling and Anchoring Strategies. Kidney samples prepared  
 370 with the x10 protocol or MAGNIFY with different methacrolein concentrations. All samples  
 371 were homogenized for 60 hours at 80 °C. To estimate expansion factors, average nuclear areas  
 372 were measured in ImageJ (left). The box defines the interquartile range, divided by the median.

373 The whiskers delineate the minimum and maximum values for each data set. Each anchoring  
374 condition was then divided by the average nuclear size from the pre-expansion images and then  
375 averaged to calculate expansion factors for the different anchoring strategies (right) with mean  
376 expansion factors, standard error of the mean (SEM) values, and n nuclei measured listed in the  
377 table below. Error bars are given in terms of SEM. **(b)** Measurement of Deformation of different  
378 gel chemistries. Blank gels were prepared in 2 mL Eppendorf tubes and gelled at 37 °C or 45 °C  
379 and fully expanded in water. Deformation was calculated in the same method described in the  
380 TREx paper<sup>7</sup>, by taking the ratio of the radius of deformation to the radius of the gel. Squares  
381 are 5 mm. **(c)** Example images of *(i)* pre-expansion images of HEK cells stained with  $\alpha$ Tubulin  
382 (scale bar 1  $\mu$ m) imaged using a Nikon CFI Plan Apo VC 60 $\times$  C WI (1.2 NA) objective and  
383 processed with SOFI compared to the same field of view *(ii)* post-expansion with MAGNIFY  
384 imaged with a Nikon APO LWD 20 $\times$  (NA 0.95) WI Lambda S objective (scale bar 1  $\mu$ m  
385 biological scale, 9.22  $\mu$ m physical scale, expansion factor, 9.22 $\times$ ). *(iii)* Root mean square (RMS)  
386 length measurement error as a function of measurement length for pre-expansion versus post  
387 expansion images. Solid line, mean of channel; shaded area, standard error of mean; n = 3  
388 technical replicates.



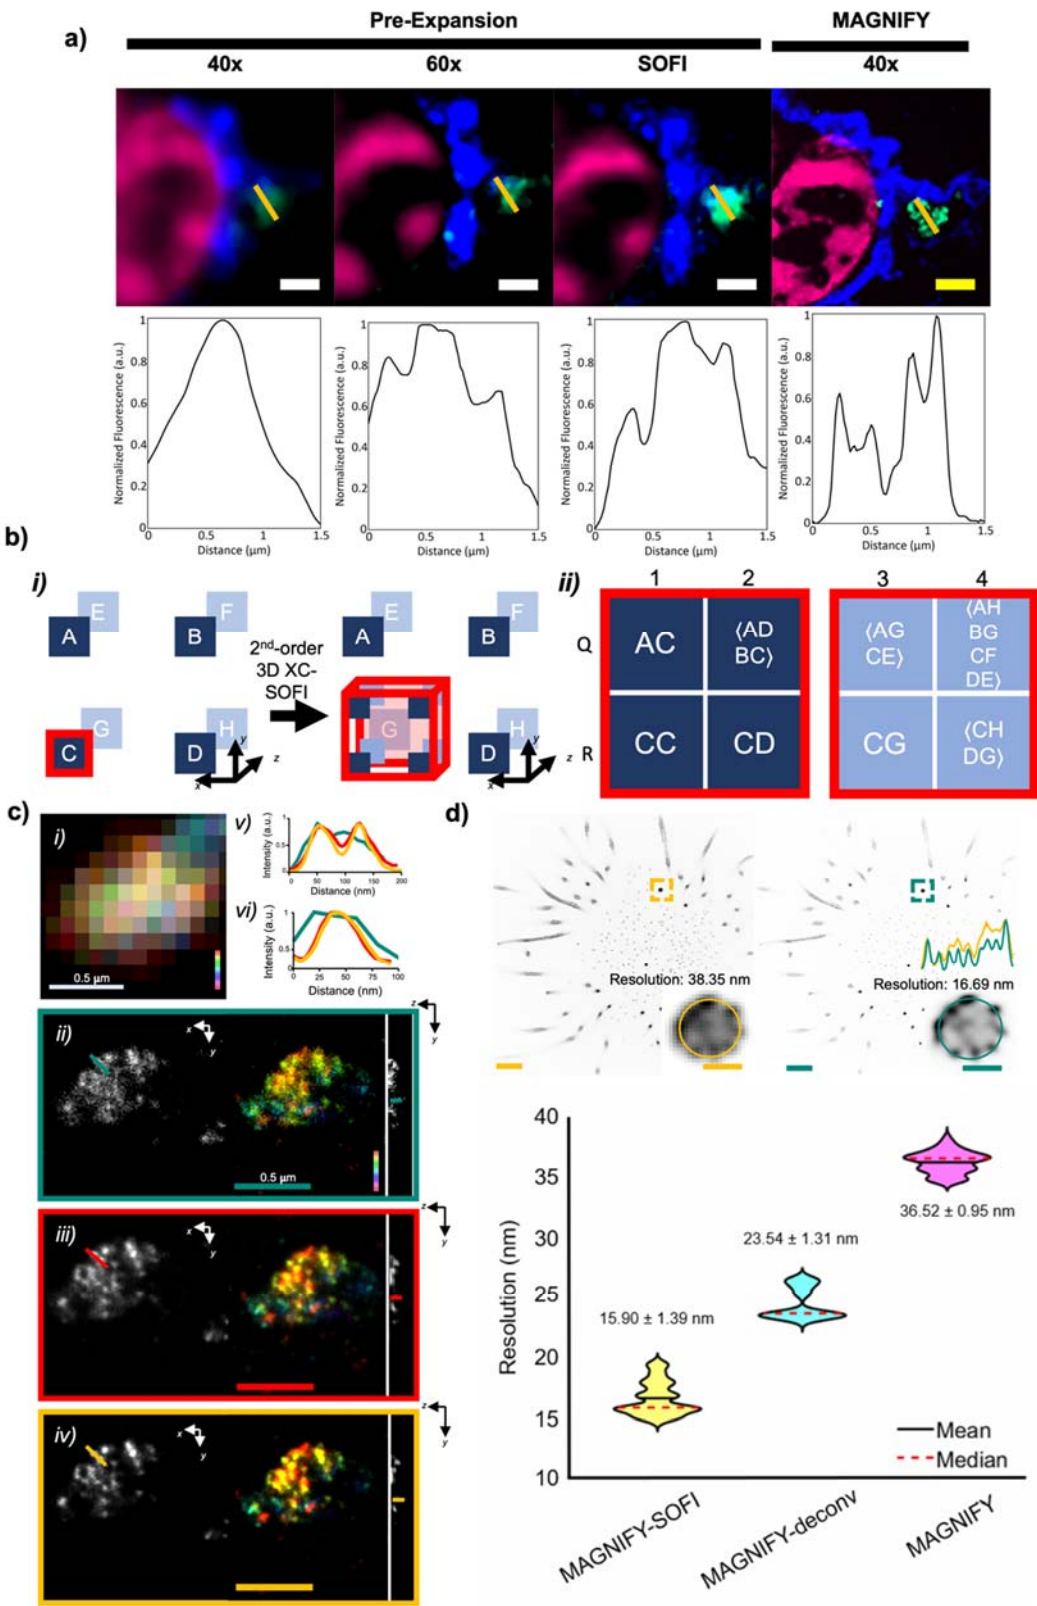

390 **Supplementary Figure 5: Overview of SOFI (a)** Second-order SOFI improves resolution pre-  
391 expansion. Top: Placenta tissue imaged pre-expansion at both 40× and 60× and post-expansion  
392 at 40×. Bottom: line profile of ATPIF channel indicated by orange line. 60× images were  
393 generated by performing a maximum intensity projection over 50 time points. This same set of  
394 images at 60× was processed using second-order SOFI with deconvolution. Resolution is seen to  
395 improve. Post-expansion images of the MAGNIFY processed sample show greater resolution  
396 enhancement. Scale bar: 1 μm (post-expansion 8.75 μm). Magenta: DAPI, Green: ATPIF, Blue:  
397 Pan-Keratin. **(b)** Generation of 3D XC-SOFI images **(i)** Each pixel in the original image  
398 becomes eight in the 2nd – order 3D XC-SOFI image by calculating its correlation with  
399 neighboring pixels. **(ii)** The generation of each new pixel in the 2nd – order 3D XC-SOFI image  
400 is given. For example, New Pixel R1 is given by calculating the autocorrelation of Pixel C in the  
401 original image, while New Pixel R2 is given by calculating the correlation between Pixels C and  
402 D. The values of New Pixels Q2, Q3, Q4, and R4 were calculated by averaging the correlations  
403 of multiple sets of Original Pixels. **(c)** Three-dimensional resolution improvement with  
404 MAGNIFY-SOFI. **(i)** A color-coded Z-projection of a pre-synapse stained for synaptophysin in a  
405 mouse brain before MAGNIFY. **(ii)** A separate synaptophysin stained pre-synapse in a mouse  
406 brain after MAGNIFY. Middle: Color-coded Z-projection of the synapse. Individual presynaptic  
407 vesicles are beginning to be resolved. Right: YZ view of the pre-synapse. Green line demarcates  
408 where line profile in **(vi)** is taken. Left: Single XY plane of the synapse. Green line demarcates  
409 where line profile in **(v)** is taken. **(iii)** As in **(ii)** but after 2nd-order 3D XC-SOFI. **(iv)** As in **(ii)**  
410 but after 3rd-order 3D XC-SOFI. **(v)**. XY intensity line profiles showing increased resolving  
411 power of MAGNIFY-SOFI. **(vi)** YZ intensity line profiles showing increased resolving power of  
412 MAGNIFY-SOFI. **(d)** Parameter-free image resolution estimation of MAGNIFY (top left panel)  
413 and MAGNIFY-SOFI (top right panel) images based on decorrelation analysis. Example images  
414 were acquired from a fully expanded human stem cell-derived lung organoid. Line profiles  
415 around an example cilium are shown for both MAGNIFY (yellow) and MAGNIFY-SOFI (green)  
416 in the right panel, demonstrating the resolution improvement. Bottom: violin plot of calculated  
417 resolutions of MANGIFY-SOFI (yellow), MAGNIFY with deconvolution (MAGNIFY-deconv;  
418 cyan), and MAGNIFY (magenta). N = 37 measurements from 4 technical replicates. Scale bar:  
419 300 nm, inset: 100 nm. All in biological scales. Expansion factor: 10.5 ×.

420

421

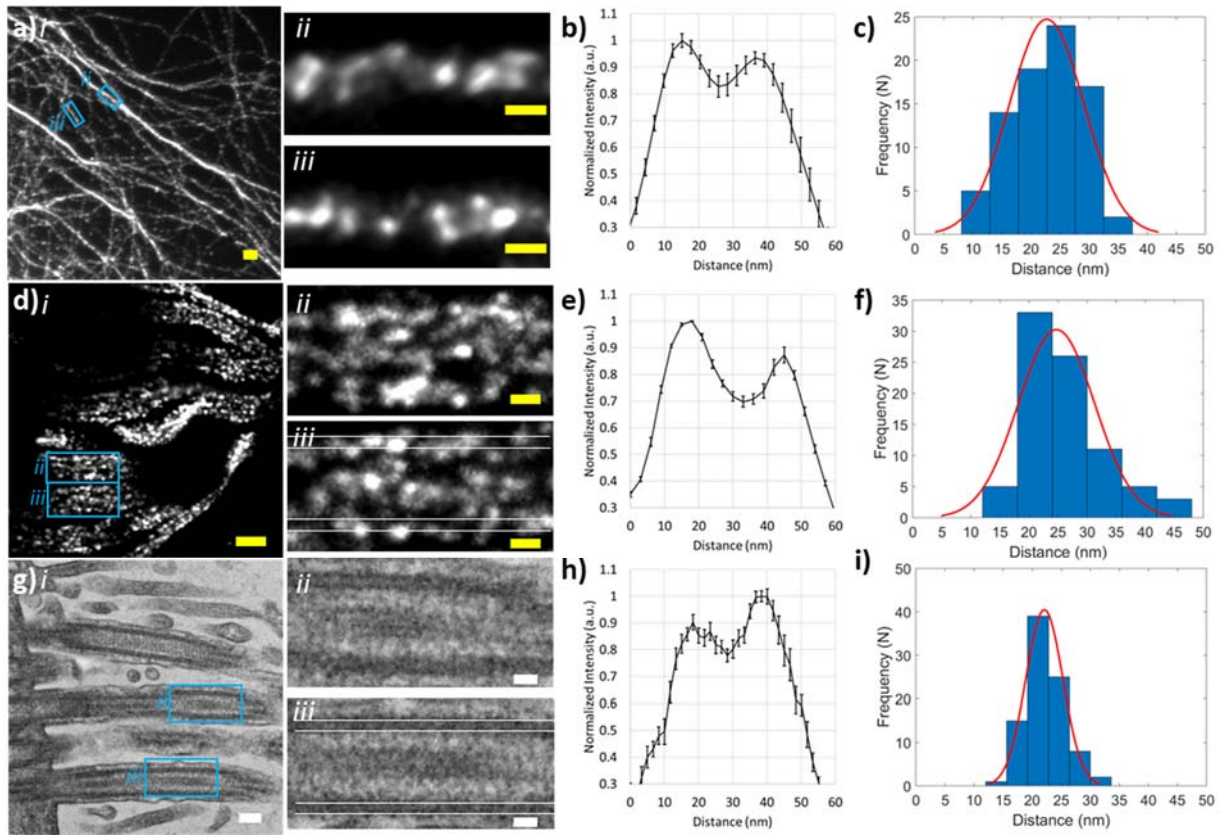

423

424

425 **Supplementary Figure 6: Example images of tubulin structure in cell culture and cilia in**  
 426 **human lung organoids.** (a) Fluorescence images of alpha and beta tubulin stained MAGNIFY-  
 427 processed fully expanded U2OS cells at 40 $\times$  magnification. *ii* and *iii* show third order SOFI  
 428 processed fluorescent images at 60 $\times$  magnification of regions indicated in *i*. (b) Example average  
 429 line profile averaged over 13 segments. Segments were averaged over 5 pixels. Error bars in  
 430 terms of SEM. (c) Peak-to-peak distances of line profiles of 81 segments of expanded U2OS  
 431 cells. The average over all distances was 22.68 nm  $\pm$  0.71 nm (mean  $\pm$  s.e.m.). (d) Second order  
 432 SOFI processed fluorescent images at 60 $\times$  magnification of cilia in fully expanded MAGNIFY-  
 433 processed human lung organoids stained with alpha and beta tubulin. *ii* and *iii* show zoomed in  
 434 regions indicated in *i*. (e) Example average line profile averaged over 7 segments. Segments  
 435 were averaged over 5 pixels. Error bars in terms of SEM. (f) Peak-to-peak distances of line  
 436 profiles of 83 segments of expanded cilia. The average over all distances was 24.72 nm  $\pm$  0.72  
 437 nm (mean  $\pm$  s.e.m.). (g) EM images of cilia in human lung organoids. *ii* and *iii* show zoomed in  
 438 regions indicated in *i*. (h) Example average line profile averaged over 13 segments. Segments  
 439 were averaged over 5 pixels. Error bars in terms of SEM. (i) Peak-to-peak distances of line  
 440 profiles of 90 segments of unexpanded cilia imaged with EM. The average over all distances was  
 441 22.09 nm  $\pm$  0.34 nm (mean  $\pm$  s.e.m.). Scale bars (biological scale): a,d,g *i*: 250 nm, a,d,g *ii-iii*:  
 442 50nm.

443

444

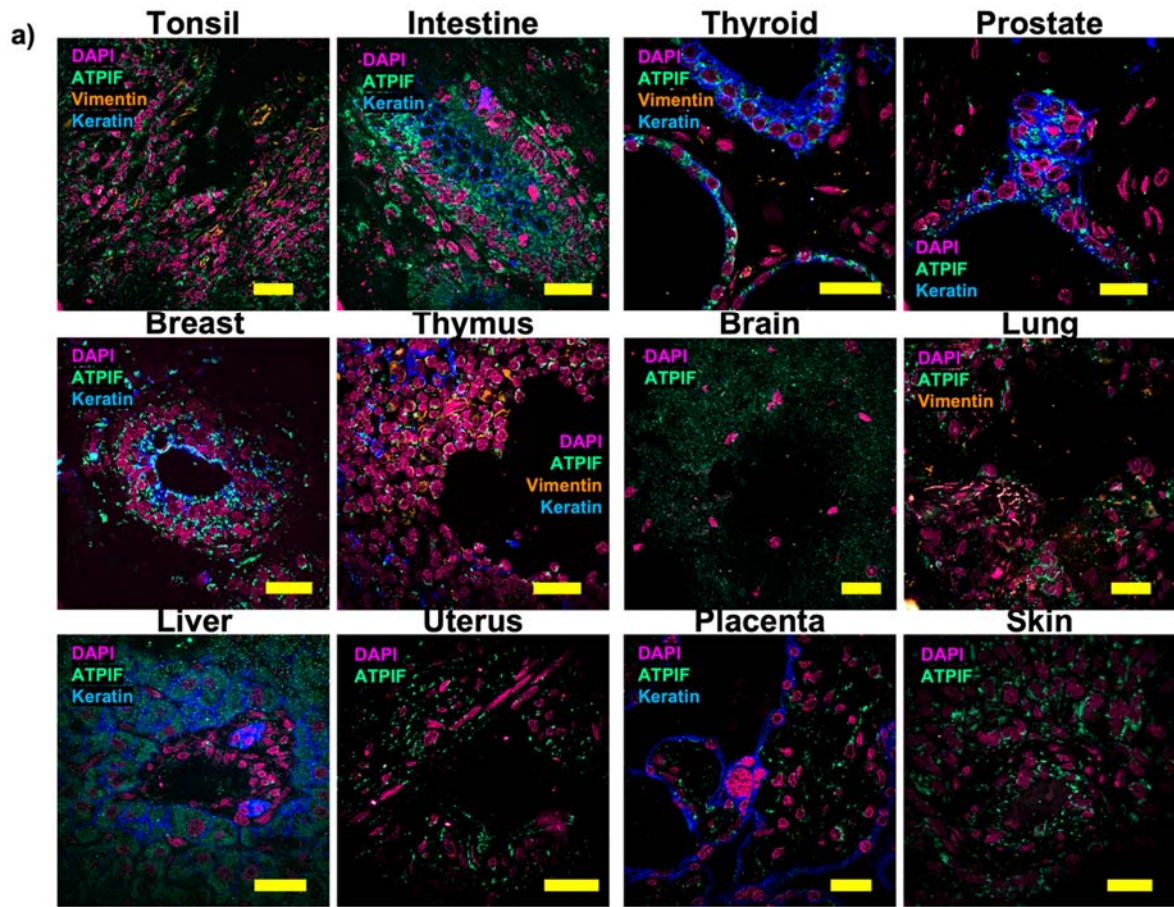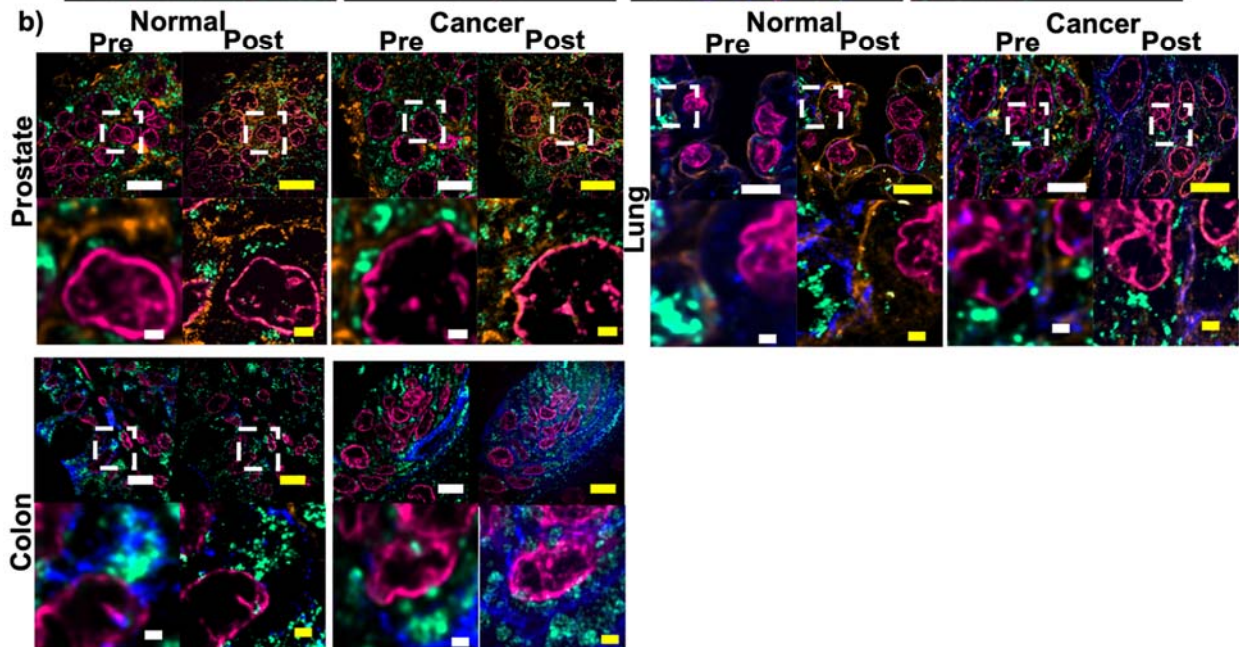

445

446 **Supplementary Figure 7: Example images of MAGNIFY expansion of FFPE tissue. (a)**  
447 Successful expansion of multiple human tissue types processed using the MAGNIFY framework.  
448 Images were obtained at 10× magnification. Scale bars are 25 μm (biological scale). Expansion  
449 factors are given in **Supplementary Table 1. (b)** Images of various tissue types for both normal  
450 (left images) and cancerous (right images) human tissues. Within each block of images for a  
451 given tissue disease type, there are four images shown. The left column shows two images, the  
452 top of which is a field of view (scale bar, 10 μm), and the bottom of which zooms into the area  
453 outlined in the top image by a red dash box (scale bar, 1 μm). The right column within the four  
454 images shows the same fields of view as are shown in the left column, but post-expansion (Scale  
455 bars are kept in the same biological scale: top images, 10 μm; bottom images, 1 μm; expansion  
456 factors: 10.4×, 10.8×, and 9.8× in water for prostate, lung, and colon, respectively); Magenta,  
457 DAPI; Green, ATPIF; Orange, WGA; Blue, PanK.

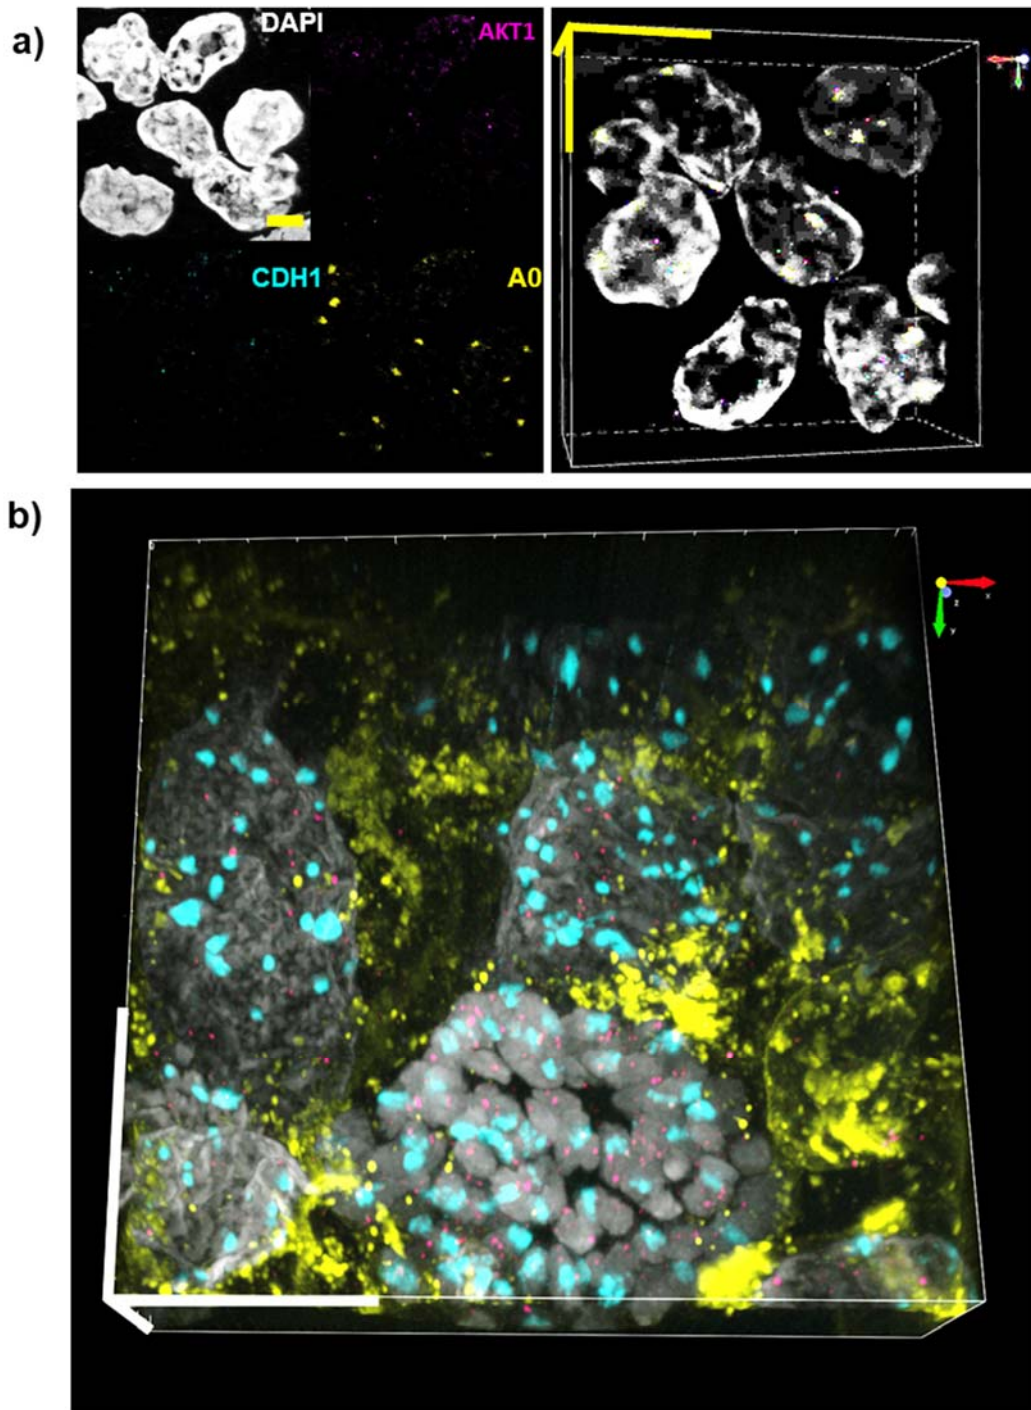

458  
 459 **Supplementary Figure 8: DNA FISH with MAGNIFY using FFPE human tissue.** After tissue  
 460 section recovery, samples were gelled using the MAGNIFY gel and anchored with 0.25%  
 461 methacrolein. After gelling, samples were treated with hot surfactant (1% w/v SDS, 8M Urea, 25  
 462 mM EDTA, 2× PBS, pH 7.5) for 48 hours at 80 °C, labeled with respective DNA FISH probes,  
 463 and expanded in 1×PBS before imaging. **(a)** Normal human lymph node tissue. Scale bars: Left:  
 464 2.5 μm, Right: x: 5 μm, y: 5 μm, z: 5.7 μm. Expansion factor: 3.5× in 1× PBS. White, DAPI;  
 465 Magenta, AKT1; Blue, CDH1, Yellow, A0. **(b)** 3D reconstruction of confocal images of  
 466 expanded human urinary bladder cancer tissue section, homogenized by proteinase K digestion.

467 Expansion factor  $3.8\times$  (in PBS buffer). Stain: Gray, DAPI; Cyan, DNA FISH probe against  
468 centromere binding protein B box motif CEPN-B; Magenta, DNA FISH probe against telomere  
469 motif TelC; Yellow, Wheat Germ Agglutinin. Scale bar: x: 20  $\mu\text{m}$ ; y: 20  $\mu\text{m}$ ; z: 20  $\mu\text{m}$ .

470

471

472 **Supplementary Videos**

473 **Supplementary Video 1.** 3D rendering of a fully expanded MAGNIFY processed human FFPE  
474 kidney tissue stained with DAPI (magenta), ACTN4 (orange), and WGA (blue) taken at 40×  
475 magnification.

476  
477 **Supplementary Video 2.** 3D rendering of a fully expanded MAGNIFY processed human FFPE  
478 colon tissue stained with DAPI (magenta), ATP1F (green), and Cytokeratin Pan Type I/II (blue)  
479 taken at 40× magnification.

480  
481 **Supplementary Video 3.** 3D rendering of a fully expanded MAGNIFY processed human FFPE  
482 placenta tissue stained with DAPI (magenta), ATP1F (green), and Cytokeratin Pan Type I/II  
483 (blue) taken at 40× magnification.

484  
485 **Supplementary Video 4.** 3D rendering of a fully expanded MAGNIFY processed human FFPE  
486 breast tissue stained with DAPI (magenta), ATP1F (green), and Cytokeratin Pan Type I/II (blue)  
487 taken at 40× magnification.

488  
489 **Supplementary Video 5.** 3D rendering of an expanded human urinary bladder cancer tissue  
490 section stained with DAPI (white), DNA FISH probe against centromere binding protein B box  
491 motif CEPN-B (cyan), DNA FISH probe against telomere motif TelC, and WGA (yellow) taken  
492 at 40× magnification.

493  
494 **Supplementary Video 6.** 3D rendering of an SST neuron in MAGNIFY processed mouse brain  
495 stained with DAPI (white), anti-GFP (blue), synaptophysin (magenta) and PSD95 (green)  
496 expanded in 1x PBS and taken at 40× magnification.

497  
498 **Supplementary Video 7.** 3D rendering of SST dendrites in MAGNIFY processed mouse brain  
499 stained with DAPI (white), anti-GFP (blue), synaptophysin (magenta) and PSD95 (green)  
500 expanded in 1x PBS and taken at 40× magnification.

501  
502 **Supplementary Video 8.** 3D rendering of SST dendrites in MAGNIFY processed mouse brain  
503 stained with DAPI (white), anti-GFP (blue), synaptophysin (magenta) and PSD95 (green)  
504 expanded in 1x PBS and taken at 40× magnification.

505  
506 **Supplementary Video 9.** 3D rendering of a MAGNIFY-SOFI image stack of fully expanded  
507 ependymal cilia and basal bodies from the ependymal cell lining in the adult mouse brain stained  
508 with NHS-ATTO-488 taken at 40× magnification.

509  
510

511

512



513

514 **Supplementary Tables**515 **Supplementary Table 1: Condition optimization for different tissue types**

| <b>Tissue Type</b> | <b>Fixation</b> | <b>Methacrolein</b> | <b>Hom. Time</b> | <b>Hom. Temp.</b> | <b>Expansion Factor</b>               |
|--------------------|-----------------|---------------------|------------------|-------------------|---------------------------------------|
| Human Kidney       | FFPE            | 0.25%               | 60 h             | 80C               | 8.64± 0.24 (N = 4)*                   |
| Human Lymph Node   | FFPE            | 0.25%               | 60 h             | 80C               | 8.46± 0.47 (N = 5)*                   |
| Human Tonsil       | FFPE            | 0.25%               | 60 h             | 80C               | 8.62 ± 0.27 (N = 6)*                  |
| Human Colon        | FFPE            | 0.25%               | 60 h             | 80C               | 9.67 ± 0.35 (N = 3)*                  |
| Human Thyroid      | FFPE            | 0.25%               | 60 h             | 80C               | 10.75 ± 0.35 (N = 3)*                 |
| Human Prostate     | FFPE            | 0.25%               | 60 h             | 80C               | 10.38 ± 0.57 (N = 3)*                 |
| Human Breast       | FFPE            | 0.25%               | 60 h             | 80C               | 9.03 ± 0.22 (N = 3)*                  |
| Human Thymus       | FFPE            | 0.25%               | 60 h             | 80C               | 10.00 ± 0.37 (N = 3)*                 |
| Human Brain        | FFPE            | 0.25%               | 10 h             | 80C               | 8.36 ± 0.25 (N = 3)*                  |
| Human Lung         | FFPE            | 0.25%               | 60 h             | 80C               | 10.77± 0.61 (N = 3)*                  |
| Human Liver        | FFPE            | 0.25%               | 60 h             | 80C               | 10.13± 0.60 (N = 3)*                  |
| Human Uterus       | FFPE            | 0.25%               | 60 h             | 80C               | 8.00 ± 0.28 (N = 3)*                  |
| Human Placenta     | FFPE            | 0.25%               | 60 h             | 80C               | 8.75 ± 0.37 (N = 3)*                  |
| Human Skin         | FFPE            | 0.25%               | 60 h             | 80C               | 9.39 ± 0.30 (N = 3)*                  |
| Mouse Brain        | PFA             | 0.1%                | 8 h              | 80C               | 11.18 ± 1.87 (N = 3)* <sup>†</sup>    |
| Lung Organoid      | PFA<br>PFA/G    | 0.1%                | 8 h              | 80C               | 9.9 ± 2.1 (N=3)<br>9.22 ± 2.3 (N=6) * |
| HEK Cells          | A               | 0.1%                | 6 h              | 80C               |                                       |

516 \* Error in terms of s.e.m. over N technical replicates.

517 <sup>†</sup> Mouse brain expansion factor was calculated by measuring different nuclei sizes in mouse  
518 striatum before and after expansion.

519

520

521

522

523

524

525

526

527

528 **Supplementary Table 2: Protein Retention for tissues under different anchoring and**  
 529 **homogenization conditions.**

| Tissue           | Anchoring    |            | Homogenization |      | Protein Retention |      |        |
|------------------|--------------|------------|----------------|------|-------------------|------|--------|
|                  | Type         | Conc.      | Type           | Time | %Retention        | SEM  | N      |
| <b>Kidney</b>    | Methcarolein | 0.25%      | Surfactant     | 60h  | 61.99             | 6.66 | 1<br>3 |
|                  | Methcarolein | 0.05%      | Surfactant     | 60h  | 13.63             | 1.86 | 8      |
|                  | Methcarolein | 0.00%      | Surfactant     | 60h  | 2.42              | 0.28 | 8      |
|                  | AcX          | 0.05 mg/mL | Surfactant     | 60h  | 2.94              | 0.57 | 1<br>4 |
|                  | Methcarolein | 0.05%      | ProK           | 3h   | 14.54             | 1.07 | 1<br>2 |
|                  | AcX          | 0.05 mg/mL | ProK           | 3h   | 3.08              | 0.46 | 9      |
| <b>Brain</b>     | Methcarolein | 0.10%      | Surfactant     | 4h   | 48.44             | 1.49 | 2<br>0 |
|                  | Methcarolein | 0.10%      | Surfactant     | 8h   | 23.76             | 0.69 | 2<br>0 |
|                  | Methcarolein | 0.10%      | Surfactant     | 12h  | 25.56             | 1.62 | 2<br>0 |
|                  | Methcarolein | 0.10%      | Surfactant     | 16h  | 14.20             | 1.06 | 2<br>0 |
|                  | Methcarolein | 0.10%      | Surfactant     | 24h  | 8.09              | 0.47 | 2<br>0 |
|                  | AcX          | 0.05 mg/mL | Surfactant     | 8h   | 12.82             | 0.77 | 2<br>0 |
|                  | Methcarolein | 0.10%      | ProK           | 2h   | 6.19              | 0.34 | 2<br>0 |
|                  | AcX          | 0.05 mg/mL | ProK           | 2h   | 7.72              | 0.41 | 2<br>0 |
| <b>Organoiod</b> | Methacrolein | 0.10%      | Surfactant     | 8h   | 76.23             | 8.46 | 1<br>3 |

\* Error in terms of s.e.m. over N technical replicates.

530  
 531  
 532  
 533  
 534  
 535  
 536  
 537  
 538  
 539  
 540  
 541  
 542

543 **Supplementary Table 3: Lipid retention in mouse brain under different anchoring and**  
 544 **homogenization conditions.**

| Anchoring    |               | Homogenization |      | Lipid Retention |      |    |
|--------------|---------------|----------------|------|-----------------|------|----|
| Type         | Concentration | Type           | Time | %Retention      | SEM  | N  |
| Methcarolein | 0.10%         | Surfactant     | 4h   | 98.10           | 2.36 | 30 |
| Methcarolein | 0.10%         | Surfactant     | 8h   | 77.05           | 1.80 | 20 |
| Methcarolein | 0.10%         | Surfactant     | 12h  | 73.23           | 2.99 | 20 |
| Methcarolein | 0.10%         | Surfactant     | 16h  | 63.60           | 3.06 | 20 |
| Methcarolein | 0.10%         | Surfactant     | 24h  | 43.07           | 3.06 | 20 |
| AcX          | 0.05 mg/mL    | Surfactant     | 8h   | 74.50           | 2.47 | 20 |
| Methcarolein | 0.10%         | ProK           | 2h   | 18.13           | 0.54 | 20 |
| AcX          | 0.05 mg/mL    | ProK           | 2h   | 17.06           | 0.80 | 20 |

545 \* Error in terms of s.e.m. over N technical replicates.

546

547 **Supplementary Table 4: Validated Primary Antibodies and fluorescent labels for Pre and**  
 548 **Post MAGNIFY Staining**

| Host    | Target                                   | Vendor        | Cat. Number |
|---------|------------------------------------------|---------------|-------------|
| Chicken | GFAP                                     | Abcam         | ab4674      |
| Chicken | GFP                                      | Abcam         | ab13970     |
| Chicken | NeuN                                     | Millipore     | ABN91       |
| Chicken | Tyrosine Hydroxalase                     | Abcam         | ab76442     |
| Chicken | Vimentin                                 | Abcam         | ab24525     |
| Goat    | PSD-95                                   | Abcam         | ab12093     |
| Goat    | CD4                                      | R&D Systems   | AF-379-SP   |
| Goat    | Talin-1                                  | Novus         | AF5456-SP   |
| Mouse   | Anti-Actin, $\alpha$ -Smooth Muscle      | Sigma Aldrich | A5228       |
| Mouse   | $\alpha$ -Tubulin                        | Sigma Aldrich | T6199       |
| Mouse   | Bassoon                                  | Abcam         | ab82958     |
| Mouse   | Cytokeratin Pan Type I/II                | Invitrogen    | MA5-13156   |
| Mouse   | Synaptophysin                            | Invitrogen    | MA1-213     |
| Mouse   | CD11c                                    | Abcam         | ab11029     |
| Mouse   | CD4                                      | Origene       | UM870010    |
| Mouse   | CD8                                      | Invitrogen    | MA1-80231   |
| Mouse   | CD8a (Alexa 488)                         | Invitrogen    | 53-0008-82  |
| Mouse   | VDAC1                                    | Abcam         | ab14734     |
| Rabbit  | $\alpha$ -Tubulin                        | Proteintech   | 11224-1-AP  |
| Rabbit  | ACTN4                                    | Sigma Aldrich | HPA001873   |
| Rabbit  | Alpha-Internexin (INA)                   | Sigma Aldrich | HPA008057   |
| Rabbit  | Amyloid Precursor Protein (APP)          | Sigma Aldrich | HPA001462   |
| Rabbit  | Anti-ATPase Inhibitory Factor 1 (ATPIF1) | Millipore     | ABC137      |
| Rabbit  | Anti-ATPase Inhibitory Factor 1 (ATPIF1) | Proteintech   | 12067-1-AP  |
| Rabbit  | GABRA1                                   | Proteintech   | 12410-1-AP  |

|        |                                               |               |            |
|--------|-----------------------------------------------|---------------|------------|
| Rabbit | GABRB1                                        | Proteintech   | 20183-1-AP |
| Rabbit | GluR2                                         | Proteintech   | 11994-1-AP |
| Rabbit | Synaptophysin                                 | Proteintech   | 17785-1-AP |
| Rabbit | CCR5                                          | Proteintech   | 17476-1-AP |
| Rabbit | CD45                                          | Abcam         | ab10558    |
| Rabbit | IL2                                           | Proteintech   | 26156-1-AP |
| Rabbit | IL-6                                          | Proteintech   | 21865-1-AP |
| Rabbit | TCR alpha Antibody                            | Novus         | NBP2-52684 |
|        | Wheat Germ Agglutinin (WGA) CF555             | Biotium       | 29076      |
|        | Wheat Germ Agglutinin (WGA) CF640R            | Biotium       | 29026      |
|        | NHS-ATTO-488                                  | Sigma Aldrich | 41698      |
|        | NHS-ATTO-532                                  | Sigma Aldrich | 88793      |
|        | Succinimidyl Ester (NHS) CF 555               | Biotium       | 92130      |
|        | Cy3 NHS ester (non-sulfonated)                | Glpbio Tech.  | GC12618-25 |
|        | Vybrant™ DiD cell-labeling solution           | Invitrogen    | V-22887    |
|        | Vybrant™ DiO cell-labeling solution           | Invitrogen    | V-22886    |
|        | Vybrant™ DiI cell-labeling solution           | Invitrogen    | V-22885    |
|        | Lycopersicon Esculentum (Tomato) Lectin (LEL) | Vector Labs   | DL-1174-1  |

549

550

551

**Supplementary Table 5: Secondary antibodies used for pre- and post-MAGNIFY staining.**

| Reactivity   | Host   | Conjugate          | Vendor         | Catalog Number |
|--------------|--------|--------------------|----------------|----------------|
| Rabbit       | Goat   | DyLight550         | Invitrogen     | SA5-10033      |
| Rabbit       | Goat   | CF555              | Biotium        | 20232          |
| Rabbit       | Goat   | Alexa Fluor 488    | Invitrogen     | A11034         |
| Rabbit       | Goat   | CF640R             | Biotium        | 20202          |
| Rabbit       | Goat   | Fab Fragment AF488 | Jackson Immuno | 111-547-003    |
| Rabbit       | Donkey | CF488A             | Biotium        | 20015          |
| Rabbit       | Donkey | Fab Fragment AF488 | Jackson Immuno | 711-547-003    |
| Mouse        | Goat   | Alexa Fluor 488    | Invitrogen     | A11001         |
| Mouse        | Goat   | CF568              | Biotium        | 20301          |
| Mouse        | Donkey | CF555              | Biotium        | 20037          |
| Mouse        | Donkey | CF640R             | Biotium        | 20177          |
| Mouse        | Donkey | Fab Fragment AF488 | Jackson Immuno | 715-547-003    |
| Chicken      | Goat   | Alexa Fluor 488    | Invitrogen     | A11039         |
| Chicken      | Goat   | DyLight 488        | Invitrogen     | SA5-10070      |
| Chicken      | Goat   | DyLight 550        | Invitrogen     | SA5-10033      |
| Chicken      | Goat   | CF488A             | Biotium        | 20020          |
| Chicken      | Goat   | CF555              | Biotium        | 20034          |
| Chicken      | Goat   | CF640              | Biotium        | 20084          |
| Goat         | Donkey | CF647              | Biotium        | 20829          |
| Streptavidin |        | CF 640             | Biotium        | 292037         |

552

553

554 **Supplementary Table 6: Comparison of expansion factors for different hydrogel chemistries**  
 555 **for different tissue types.**

| Components Concentrations |     |    |      |      |     |              | Expansion Factor |             |
|---------------------------|-----|----|------|------|-----|--------------|------------------|-------------|
| DMAA                      | SA  | AA | Bis  | NaCl | PBS | Anchoring    | Human Kidney     | Mouse Brain |
| 4                         | 34  | 10 | 0.01 | 1    | 1   | Methacrolein | 8.14             | 10.6        |
| 0                         | 15  | 5  | 0.05 | 11.7 | 1   | AcX          | 5.54             | N/A         |
| 26.7                      | 6.4 | 0  | 0    | 0    | 0   | AcX          | 6.03             | N/A         |

556 \*PBS given in terms of 1x PBS concentration. N,N-Dimethylacrylamide (DMAA), Sodium  
 557 acrylate (SA), Acrylamide (AA), N,N'-Methylenebisacrylamide (Bis), NaCl given in terms of  
 558 w/v%.  
 559

560 **Supplementary Table 7: Exploration of different hydrogel chemistries and their respective**  
 561 **expansion factors of blank gels in water.**

| Components Concentrations |     |     |       |      |     |      |       | Ex Factor |
|---------------------------|-----|-----|-------|------|-----|------|-------|-----------|
| DMAA                      | SA  | AA  | Bis   | NaCl | PBS | APS  | 4HT   |           |
| 1.5                       | 37  | 15  | 0.01  | 1    | 1   | 1:50 | 1:500 | 6.5 (n=2) |
| 2                         | 34  | 10  | 0.01  | 1    | 1   | 1:30 | 0     | 7.76      |
| 2                         | 34  | 10  | 0.01  | 1    | 1   | 1:50 | 1:500 | 7.5 (n=2) |
| 4                         | 30  | 10  | 0.01  | 1    | 1   | 1:30 | 0     | 6.45      |
| 4                         | 34  | 10  | 0.01  | 1    | 1   | 1:30 | 0     | 7.86      |
| 4                         | 33  | 10  | 0.01  | 1    | 1   | 1:50 | 1:500 | 7.5 (n=2) |
| 8                         | 30  | 10  | 0.01  | 1    | 1   | 1:30 | 0     | 7.46      |
| 0                         | 15  | 5   | 0.05  | 11.7 | 1   | 1:30 | 0     | 6.5       |
| 0                         | 8.6 | 2.5 | 0.075 | 11.7 | 1   | 1:30 | 0     | 6         |

562 \*PBS given in terms of 1x PBS concentration. N,N-Dimethylacrylamide (DMAA), Sodium  
 563 acrylate (SA), Acrylamide (AA), N,N'-Methylenebisacrylamide (Bis), NaCl given in terms of  
 564 w/v%.  
 565

566 **Supplementary Table 8: Gelling Conditions for MAGNIFY Gel.**

| Temp | APS  | 4HT   | Ex Factor |
|------|------|-------|-----------|
| 45C  | 1:50 | 1:500 | 7         |
| 45C  | 1:40 | 1:500 | 8         |
| 45C  | 1:30 | 1:500 | 8         |
| 45C  | 1:50 | 1:250 | 7         |
| 45C  | 1:40 | 1:250 | 8         |
| 45C  | 1:30 | 1:250 | 7.5       |
| 37C  | 1:50 | 1:500 | 8         |
| 37C  | 1:40 | 1:500 | 8.5       |
| 37C  | 1:30 | 1:500 | 8         |
| 37C  | 1:50 | 1:250 | 7.5       |
| 37C  | 1:40 | 1:250 | 8         |
| 37C  | 1:30 | 1:250 | 7         |

567

568 **Supplementary Table 9: Deformation testing of different gel chemistries**

|                        | Gel  |    |      |       |      |     | Deformation | EF           | N |
|------------------------|------|----|------|-------|------|-----|-------------|--------------|---|
|                        | DMAA | SA | AA   | Bis   | NaCl | PBS |             |              |   |
| <b>MAGNIFY</b>         | 4    | 34 | 10   | 0.01  | 1    | 1   | 0.03± 0.01  | 5.9±0.2<br>8 | 4 |
| <b>TREx (Low Bis)</b>  | 0    | 11 | 14.5 | 0.005 | 0    | 1   | N/A         |              |   |
| <b>TREx (Med. Bis)</b> | 0    | 11 | 14.5 | 0.009 | 0    | 1   | 0.51± 0.10  | 6.6±0.1<br>0 | 4 |
| <b>TREx (High Bis)</b> | 0    | 11 | 14.5 | 0.015 | 0    | 1   | 0.28± 0.09  | 5.9±0.2<br>7 | 3 |
| <b>ExPath</b>          | 0    | 15 | 5    | 0.05  | 11.7 | 1   | 0.04± 0.02  | 4.3±0.1<br>4 | 4 |

569 \*Errors given in terms of s.e.m.

570 \*\*PBS given in terms of 1x PBS concentration. N,N-Dimethylacrylamide (DMAA), Sodium acrylate  
571 (SA), Acrylamide (AA), N,N'-Methylenebisacrylamide (Bis), NaCl given in terms of w/v%.

572

573  
574  
575

**Supplementary Table 10: Gelling Solution Recipe**

| <b>Component</b>                                       | <b>Stock Concentration *</b> | <b>Amount (mL)</b> | <b>Final Concentration</b> |
|--------------------------------------------------------|------------------------------|--------------------|----------------------------|
| N,N-dimethylacrylamide (DMAA)                          |                              | 0.416              | 4                          |
| Sodium acrylate (SA)                                   | 50                           | 6.8                | 34                         |
| Acrylamide                                             | 66.7                         | 1.499              | 10                         |
| N,N'-Methylenebisacrylamide                            | 2                            | 0.05               | 0.01                       |
| Sodium chloride                                        | 30                           | 0.333              | 1                          |
| PBS                                                    | 10x                          | 1                  | 1x                         |
| <b>Total Volume</b>                                    |                              | <b>10 mL</b>       |                            |
| * Note All concentrations given in g/100 mL except PBS |                              |                    |                            |

576  
577

**Supplementary Table 11: List of Chemicals and Reagents**

| Step                                    | Reagent                                 | Acronym                               | Vendor                   | Catalog Number |
|-----------------------------------------|-----------------------------------------|---------------------------------------|--------------------------|----------------|
| <b>Gelling</b>                          | N,N-dimethylacrylamide                  | DMAA                                  | Sigma Aldrich            | 274135         |
|                                         | Sodium acrylate                         | SA                                    | AK Scientific            | R624           |
|                                         | Sodium acrylate                         | SA                                    | Santa Cruz Biotechnology | sc-236893B     |
|                                         | Acrylamide                              | AA                                    | Sigma Aldrich            | A8887          |
|                                         | N,N'-Methylenebisacrylamide             | BIS                                   | Sigma Aldrich            | M7279          |
|                                         | 4-hydroxy-TEMPO                         | 4HT                                   | Sigma Aldrich            | 176141         |
|                                         | Sodium chloride                         | NaCl                                  | Sigma Aldrich            | S6191          |
|                                         | Phosphate Buffered Saline, 10x Solution | PBS                                   | Fischer Scientific       | BP399-1        |
|                                         | Acryloyl-X, SE                          | AcX                                   | Invitrogen               | A20770         |
|                                         | Ammonium persulfate                     | APS                                   | Sigma Aldrich            | A3678          |
|                                         | N,N,N',N'-Tetramethylethylenediamine    | TEMED                                 | Sigma Aldrich            | T9281          |
|                                         | Methacrolein                            |                                       | Sigma Aldrich            | 133035         |
|                                         |                                         |                                       |                          |                |
|                                         | <b>Homogenizing</b>                     | Ethylenediaminetetraacetic acid 0.5 M | EDTA                     | VWR            |
| Triton X-100                            |                                         |                                       | Sigma Aldrich            | T8787          |
| Tris Base                               |                                         |                                       | Fischer Scientific       | BP152-1        |
| Sodium chloride                         |                                         | NaCl                                  | Sigma Aldrich            | S6191          |
| Proteinase K (Molecular Biology Grade)  |                                         | ProK                                  | Thermo Scientific        | EO0491         |
| Phosphate Buffered Saline, 10x Solution |                                         | PBS                                   | Fischer Scientific       | BP399-1        |
| Sodium dodecyl sulfate                  |                                         | SDS                                   | Sigma Aldrich            | L3771          |
| Urea                                    |                                         |                                       | Sigma Aldrich            | U5378          |
| Glycine                                 |                                         |                                       | Sigma Aldrich            | G8898          |
|                                         |                                         |                                       |                          |                |
| <b>Other</b>                            | Sodium citrate tribasic dihydrate       |                                       | Sigma Aldrich            | C8532-1KG      |
|                                         | Xylenes                                 |                                       | Sigma Aldrich            | 214736         |
|                                         | Ethanol                                 |                                       | Pharmco                  | 111000200      |
|                                         | SuperBlock Blocking Buffer in PBS       |                                       | Thermo Scientific        | 37515          |
|                                         | Heparin                                 |                                       | Sigma Aldrich            | H3393          |
|                                         | DAPI                                    |                                       | Thermo                   | 62248          |



**Supplementary Table 12: DNA FISH probes design**

| Name    | Target sequence                        | Oligo sequence                                              |
|---------|----------------------------------------|-------------------------------------------------------------|
| AKT1-1  | ATGTCGATCCTAGAGTCCAGAACGGGGACTTCC      | ATGTCGATCCTAGAGTCCAGAACGGGGACTTCCATAATCGCTAGGCACCTGGATT     |
| AKT1-2  | GGAACGTGTTCAAAGAGGAGGAGACTCCGGACA      | GGAACGTGTTCAAAGAGGAGGAGACTCCGGACAATAATCGCTAGGCACCTGGATT     |
| AKT1-3  | AATCGCCAGAGAAGTAGAGAGTGTGTTTGGCGGG     | AATCGCCAGAGAAGTAGAGAGTGTGTTTGGCGGGATAATCGCTAGGCACCTGGATT    |
| AKT1-4  | ACCGGATCATCTTCACAACAGTCCATTAAGTAGACGC  | ACCGGATCATCTTCACAACAGTCCATTAAGTAGACGCATAATCGCTAGGCACCTGGATT |
| AKT1-5  | GGTCTCATTCTTCTCTGCCTTGGAGTCCGGGA       | GGTCTCATTCTTCTCTGCCTTGGAGTCCGGGAATAATCGCTAGGCACCTGGATT      |
| AKT1-6  | AATGGAGAATGTAGTGGAGGAGTCACCCAGTCAAG    | AATGGAGAATGTAGTGGAGGAGTCACCCAGTCAAGATAATCGCTAGGCACCTGGATT   |
| AKT1-7  | AACTGCAGCTTGGACCCCTGGAATGACACT         | AACTGCAGCTTGGACCCCTGGAATGACACTATAATCGCTAGGCACCTGGATT        |
| AKT1-8  | GCACTTACAGCCACTGAGACTAGCTTAGGGACGG     | GCACTTACAGCCACTGAGACTAGCTTAGGGACGGATAATCGCTAGGCACCTGGATT    |
| AKT1-9  | GAACTCAGATGTGACTGCTCCCTTCTGCC          | GAACTCAGATGTGACTGCTCCCTTCTGCCATAATCGCTAGGCACCTGGATT         |
| AKT1-10 | ACCCTTCACTGGTTTCTTTCATCCCTGTCTCTGC     | ACCCTTCACTGGTTTCTTTCATCCCTGTCTCTGCATAATCGCTAGGCACCTGGATT    |
| AKT1-11 | TCACTTGGTGCTTAAAAGTTGGCAGGACGCAAGT     | TCACTTGGTGCTTAAAAGTTGGCAGGACGCAAGTATAATCGCTAGGCACCTGGATT    |
| AKT1-12 | TGGGTCTCAAGTGCAGGAATGACAGGACACC        | TGGGTCTCAAGTGCAGGAATGACAGGACACCATAATCGCTAGGCACCTGGATT       |
| AKT1-13 | TTTTGTGCGAAACATCTGGCCACAGAGCACCT       | TTTTGTGCGAAACATCTGGCCACAGAGCACCTATAATCGCTAGGCACCTGGATT      |
| AKT1-14 | GGGGTGTCTTGAAGAGAGGACTCTGCTTCCCT       | GGGGTGTCTTGAAGAGAGGACTCTGCTTCCCTATAATCGCTAGGCACCTGGATT      |
| AKT1-15 | GGCCTCCTTGGAGACAGCCAGTGCAAATAAGC       | GGCCTCCTTGGAGACAGCCAGTGCAAATAAGCATAATCGCTAGGCACCTGGATT      |
| AKT1-16 | AAGAGGTCCAACCACTTCAAGAACAGCCCGC        | AAGAGGTCCAACCACTTCAAGAACAGCCCGCATAATCGCTAGGCACCTGGATT       |
| AKT1-17 | CCCTTACCCTCTGCTTCCCTGAATTCT            | CCCTTACCCTCTGCTTCCCTGAATTCTATAATCGCTAGGCACCTGGATT           |
| AKT1-18 | GGATGGTGGACAGATACCAGGAACTTCTCCTCGG     | GGATGGTGGACAGATACCAGGAACTTCTCCTCGGATAATCGCTAGGCACCTGGATT    |
| AKT1-19 | TACAAAGTCTGAGCTGGGAGGGAGCAGAGGT        | TACAAAGTCTGAGCTGGGAGGGAGCAGAGGTATAATCGCTAGGCACCTGGATT       |
| AKT1-20 | GGGGAGAGAGTCTTCTCTTGGTCAGCCCC          | GGGGAGAGAGTCTTCTCTTGGTCAGCCCCATAATCGCTAGGCACCTGGATT         |
| AKT1-21 | AGAAAGGGGTCTGTGTCCCACTTACTCATTCCATAACC | AGAAAGGGGTCTGTGTCCCACTTACTCATTCCATAATCGCTAGGCACCTGGATT      |
| AKT1-22 | GGGGACATCCAGAGGTCTTTGAGTCCAGCC         | GGGGACATCCAGAGGTCTTTGAGTCCAGCCATAATCGCTAGGCACCTGGATT        |
| AKT1-23 | GCTTTCATCCTGCTAAGTACTTGGGGCATTCCC      | GCTTTCATCCTGCTAAGTACTTGGGGCATTCCCATAATCGCTAGGCACCTGGATT     |
| AKT1-24 | TCAGAGGGGAAATGAGGAAGCCATGCAGGATCA      | TCAGAGGGGAAATGAGGAAGCCATGCAGGATCAATAATCGCTAGGCACCTGGATT     |
| AKT1-25 | AGGAACACCATGGACAGGGAGAGCAAACGG         | AGGAACACCATGGACAGGGAGAGCAAACGGATAATCGCTAGGCACCTGGATT        |
| AKT1-26 | AGCCTAGAATAAGGAGAGGCCAGGTCCAGG         | AGCCTAGAATAAGGAGAGGCCAGGTCCAGGATAATCGCTAGGCACCTGGATT        |

|         |                                      |                                                            |
|---------|--------------------------------------|------------------------------------------------------------|
| AKT1-27 | TAGCCAGGCGTGGCCTCACATTAGCT           | TAGCCAGGCGTGGCCTCACATTAGCTATAATCGCTAGGCACCTGGATT           |
| AKT1-28 | GTAGTAGCCCCAGGGTCTGTGAGTGCCTG        | GTAGTAGCCCCAGGGTCTGTGAGTGCCTGATAATCGCTAGGCACCTGGATT        |
| AKT1-29 | TTTTGCTCCTCTGCTGCTAGGGTGGGC          | TTTTGCTCCTCTGCTGCTAGGGTGGGCATAATCGCTAGGCACCTGGATT          |
| AKT1-30 | AAGTCACTCTTTCTGCCCCAGGCGGAATC        | AAGTCACTCTTTCTGCCCCAGGCGGAATCATAATCGCTAGGCACCTGGATT        |
| AKT1-31 | GTTTCACATCTGGTAGTGGGGAGACCCCAAACAC   | GTTTCACATCTGGTAGTGGGGAGACCCCAAACACATAATCGCTAGGCACCTGGATT   |
| AKT1-32 | AAAAGTAGGTGTCACAAGATGGGGCATTGTGGGATG | AAAAGTAGGTGTCACAAGATGGGGCATTGTGGGATGATAATCGCTAGGCACCTGGATT |
| AKT1-33 | AGAGCAAGGTCATTGAGCTCCTTGGGCCT        | AGAGCAAGGTCATTGAGCTCCTTGGGCCTATAATCGCTAGGCACCTGGATT        |
| AKT1-34 | CAGTTTCCCATCTACACCAGGGAGCGGT         | CAGTTTCCCATCTACACCAGGGAGCGGTATAATCGCTAGGCACCTGGATT         |
| AKT1-35 | ATAGCCCCTCTTGTGCCGAGAGCAGGT          | ATAGCCCCTCTTGTGCCGAGAGCAGGTATAATCGCTAGGCACCTGGATT          |
| AKT1-36 | TCCTTGGGAGGTGAGCGTCATCTCTGGGA        | TCCTTGGGAGGTGAGCGTCATCTCTGGGAATAATCGCTAGGCACCTGGATT        |
| AKT1-37 | TGTGTGTGCTCTGAGTCAGAGGAGCTTCAGGG     | TGTGTGTGCTCTGAGTCAGAGGAGCTTCAGGGATAATCGCTAGGCACCTGGATT     |
| AKT1-38 | GGCCTCTGGGTCTGCACATCTAACAGGGAG       | GGCCTCTGGGTCTGCACATCTAACAGGGAGATAATCGCTAGGCACCTGGATT       |
| AKT1-39 | CTTTGGCCAGAGGCTGTGTGGCTCTTTGAGG      | CTTTGGCCAGAGGCTGTGTGGCTCTTTGAGGATAATCGCTAGGCACCTGGATT      |
| AKT1-40 | TACTTTCCCAAACAGCTTGCTCACCTTGCCC      | TACTTTCCCAAACAGCTTGCTCACCTTGCCATAATCGCTAGGCACCTGGATT       |
| AKT1-41 | TTCCTACCCAGTGTGTTACTTCGCTTTGGTGAGC   | TTCCTACCCAGTGTGTTACTTCGCTTTGGTGAGCATAATCGCTAGGCACCTGGATT   |
| AKT1-42 | AAAACAACAAAAGAGGAAGCCGAGGTGGCCTTGA   | AAAACAACAAAAGAGGAAGCCGAGGTGGCCTTGAATAATCGCTAGGCACCTGGATT   |
| AKT1-43 | TGGAATGATTCTGTGCTGGGGCCTAGACC        | TGGAATGATTCTGTGCTGGGGCCTAGACCATAATCGCTAGGCACCTGGATT        |
| AKT1-44 | CCCGTACACCTTCCACTCTCAGGAGAAGCCT      | CCCGTACACCTTCCACTCTCAGGAGAAGCCTATAATCGCTAGGCACCTGGATT      |
| AKT1-45 | TGCCGCCTTTAGGTGTGTTTTCTTGAACCTTAAGG  | TGCCGCCTTTAGGTGTGTTTTCTTGAACCTTAAGGATAATCGCTAGGCACCTGGATT  |
| AKT1-46 | AGGAGAATGGAAAGCTGAGACCCAGGTGCTTCC    | AGGAGAATGGAAAGCTGAGACCCAGGTGCTTCCATAATCGCTAGGCACCTGGATT    |
| AKT1-47 | ATGGTGGAGCGGAAGGAGGTGAAGAATTTGCA     | ATGGTGGAGCGGAAGGAGGTGAAGAATTTGCAATAATCGCTAGGCACCTGGATT     |
| AKT1-48 | GTTTGTGTCAAGTTACAACCCCTGCCTTGGCG     | GTTTGTGTCAAGTTACAACCCCTGCCTTGGCGATAATCGCTAGGCACCTGGATT     |
| AKT1-49 | ACTTTGAGAGAATGTTTCAGGGAGCTGAGGACGTGG | ACTTTGAGAGAATGTTTCAGGGAGCTGAGGACGTGGATAATCGCTAGGCACCTGGATT |
| AKT1-50 | CCTGGGGACCCTCAGGATAGTGAAGGAGAAGAC    | CCTGGGGACCCTCAGGATAGTGAAGGAGAAGACATAATCGCTAGGCACCTGGATT    |
| AKT1-51 | CCCCGTGGCTCCCTGGAAAGTAGAATGCC        | CCCCGTGGCTCCCTGGAAAGTAGAATGCCATAATCGCTAGGCACCTGGATT        |
| AKT1-52 | AGACCTCTTCCAGCCTCCTGTCCATGGT         | AGACCTCTTCCAGCCTCCTGTCCATGGTATAATCGCTAGGCACCTGGATT         |
| AKT1-53 | AGAGATGAGAGACATGTGACGCTCCCTGCTCC     | AGAGATGAGAGACATGTGACGCTCCCTGCTCCATAATCGCTAGGCACCTGGATT     |
| AKT1-54 | GCCCTGCTGTGGCTTTATTCCTTACCTGTAGCG    | GCCCTGCTGTGGCTTTATTCCTTACCTGTAGCGATAATCGCTAGGCACCTGGATT    |

|         |                                        |                                                              |
|---------|----------------------------------------|--------------------------------------------------------------|
| AKT1-55 | GTTGGGCATGCAGGTGTGACTGAGTGGC           | GTTGGGCATGCAGGTGTGACTGAGTGGCATAATCGCTAGGCACCTGGATT           |
| AKT1-56 | CTTTCTTTGAGGCCTGCGGTCTCCGACT           | CTTTCTTTGAGGCCTGCGGTCTCCGACTATAATCGCTAGGCACCTGGATT           |
| AKT1-57 | CTGAAGCTTCTAGTTGGGAGGGGCAGAGGC         | CTGAAGCTTCTAGTTGGGAGGGGCAGAGGCATAATCGCTAGGCACCTGGATT         |
| AKT1-58 | CTCGTAACCATGCAGGAGACTCACTGTGACTTGTC    | CTCGTAACCATGCAGGAGACTCACTGTGACTTGTCATAATCGCTAGGCACCTGGATT    |
| AKT1-59 | TTCAGATTAGGCCATAGGTGAGTGGCCTGGAGC      | TTCAGATTAGGCCATAGGTGAGTGGCCTGGAGCATAATCGCTAGGCACCTGGATT      |
| AKT1-60 | GTGTATTCCAGTGTGGCTGTGTCCAGGTGT         | GTGTATTCCAGTGTGGCTGTGTCCAGGTGTATAATCGCTAGGCACCTGGATT         |
| AKT1-61 | ATGTATGTGTGCCCCAGGTGTGGCTGTGC          | ATGTATGTGTGCCCCAGGTGTGGCTGTGCATAATCGCTAGGCACCTGGATT          |
| AKT1-62 | TGGGTGTGCTCCAGGTGGCTGTATTTCC           | TGGGTGTGCTCCAGGTGGCTGTATTTCCATAATCGCTAGGCACCTGGATT           |
| AKT1-63 | AAAAGCAGGACATTTCTACACTAGGTGGGACAAGCAGG | AAAAGCAGGACATTTCTACACTAGGTGGGACAAGCAGGATAATCGCTAGGCACCTGGATT |
| AKT1-64 | ATCTCCATACCCCTCATCCTCTGAGGCCTGG        | ATCTCCATACCCCTCATCCTCTGAGGCCTGGATAATCGCTAGGCACCTGGATT        |
| AKT1-65 | CTGAGTGTATGTGGCCAGACCAGGTCAAGTGG       | CTGAGTGTATGTGGCCAGACCAGGTCAAGTGGATAATCGCTAGGCACCTGGATT       |
| AKT1-66 | AGTTCAGGTCACTGTGTTTGGGGACGATTCTCC      | AGTTCAGGTCACTGTGTTTGGGGACGATTCTCCATAATCGCTAGGCACCTGGATT      |
| AKT1-67 | CACCTTGCTCACCTTTCAAACACTCCTTGGCACC     | CACCTTGCTCACCTTTCAAACACTCCTTGGCACCATAATCGCTAGGCACCTGGATT     |
| AKT1-68 | GGGTGACTTGTTCTGCTGAGTTAGGGCTTCTG       | GGGTGACTTGTTCTGCTGAGTTAGGGCTTCTGATAATCGCTAGGCACCTGGATT       |
| AKT1-69 | AGATTGTGTCAGCCCTGGACTACCTGCACTCG       | AGATTGTGTCAGCCCTGGACTACCTGCACTCGATAATCGCTAGGCACCTGGATT       |
| AKT1-70 | CCTTGCTTTCAGGGCTGCTCAAGAAGGACCC        | CCTTGCTTTCAGGGCTGCTCAAGAAGGACCCATAATCGCTAGGCACCTGGATT        |
| AKT1-71 | GCGGTACCGACACTGTGGCCTGTTTCC            | GCGGTACCGACACTGTGGCCTGTTTCCATAATCGCTAGGCACCTGGATT            |
| AKT1-72 | CATGCAGCATCGCTTCTTTGCCGGTATCGT         | CATGCAGCATCGCTTCTTTGCCGGTATCGTATAATCGCTAGGCACCTGGATT         |
| AKT1-73 | CGCATGCTCCCCACATATCCACACTCACGC         | CGCATGCTCCCCACATATCCACACTCACGCATAATCGCTAGGCACCTGGATT         |
| AKT1-74 | AGCCTGCTGCAGTCTGGTACAAGGAGG            | AGCCTGCTGCAGTCTGGTACAAGGAGGATAATCGCTAGGCACCTGGATT            |
| AKT1-75 | TCATCTTTCAGGGACCCTAGGAGCCCTGGC         | TCATCTTTCAGGGACCCTAGGAGCCCTGGCATAATCGCTAGGCACCTGGATT         |
| AKT1-76 | GCTGGGTTTCGGAAGCCTGCACTCTGAGA          | GCTGGGTTTCGGAAGCCTGCACTCTGAGAATAATCGCTAGGCACCTGGATT          |
| AKT1-77 | GCCCAGCCTTGACCAGAGACCTTGCTAATTGA       | GCCCAGCCTTGACCAGAGACCTTGCTAATTGAATAATCGCTAGGCACCTGGATT       |
| AKT1-78 | AGATCCAGGTGCTTTGAAGGTCTTGAGCACACTTG    | AGATCCAGGTGCTTTGAAGGTCTTGAGCACACTTGATAATCGCTAGGCACCTGGATT    |
| AKT1-79 | AAAAGGTTCTTTTGGAGAGTGCCAATGATCAGGGTG   | AAAAGGTTCTTTTGGAGAGTGCCAATGATCAGGGTGATAATCGCTAGGCACCTGGATT   |
| AKT1-80 | TGGGCTGTCTGTACCAGCTATCTGTCATCTCT       | TGGGCTGTCTGTACCAGCTATCTGTCATCTCTATAATCGCTAGGCACCTGGATT       |
| AKT1-81 | TTTTGGCTCACTTTGCTGGGTGGAAGAGTGGG       | TTTTGGCTCACTTTGCTGGGTGGAAGAGTGGGATAATCGCTAGGCACCTGGATT       |
| AKT1-82 | ATGAAGGAGACCATTGGACCACGTGGCCA          | ATGAAGGAGACCATTGGACCACGTGGCCAATAATCGCTAGGCACCTGGATT          |

|          |                                          |                                                                |
|----------|------------------------------------------|----------------------------------------------------------------|
| AKT1-83  | GGTAGGGCAGTGAATGAGACAGACCACCAGGA         | GGTAGGGCAGTGAATGAGACAGACCACCAGGAATAATCGCTAGGCACCTGGATT         |
| AKT1-84  | AGGACAGATAGGGCAGGGCCAGAGTTGG             | AGGACAGATAGGGCAGGGCCAGAGTTGGATAATCGCTAGGCACCTGGATT             |
| AKT1-85  | CTGGCGATGGCAATTGGCCCTCTCTAAGG            | CTGGCGATGGCAATTGGCCCTCTCTAAGGATAATCGCTAGGCACCTGGATT            |
| AKT1-86  | CCAAGAACAGCCACATCTGGAGCAGCCC             | CCAAGAACAGCCACATCTGGAGCAGCCCATAATCGCTAGGCACCTGGATT             |
| AKT1-87  | CCCCTCTGACAATATAGGATTGCCTTAGGGCCATTTCT   | CCCCTCTGACAATATAGGATTGCCTTAGGGCCATTTCTATAATCGCTAGGCACCTGGATT   |
| AKT1-88  | CTCTGAGAATTTCCCGACCCTCCTAGCAGCCC         | CTCTGAGAATTTCCCGACCCTCCTAGCAGCCCATAATCGCTAGGCACCTGGATT         |
| AKT1-89  | GGGGAAAGTGTCTAGGGCAAAGAAGCATTGAGAAGATGT  | GGGGAAAGTGTCTAGGGCAAAGAAGCATTGAGAAGATGTATAATCGCTAGGCACCTGGATT  |
| AKT1-90  | TTTTGGTGAGAGAGTTTAGGTAAGGTACCCAGAGCCATGT | TTTTGGTGAGAGAGTTTAGGTAAGGTACCCAGAGCCATGTATAATCGCTAGGCACCTGGATT |
| AKT1-91  | ATCAGGCAGTAAGTCACTGAACCACGATTTGAATTCAGCC | ATCAGGCAGTAAGTCACTGAACCACGATTTGAATTCAGCCATAATCGCTAGGCACCTGGATT |
| AKT1-92  | TTTCACCGGATGGACTGCATCTTTATTTCTAAACCTGGC  | TTTCACCGGATGGACTGCATCTTTATTTCTAAACCTGGCATAATCGCTAGGCACCTGGATT  |
| AKT1-93  | TCTTTCACAAAAGGGTTATTATCAACTGTGGCCTCTGGA  | TCTTTCACAAAAGGGTTATTATCAACTGTGGCCTCTGGAATAATCGCTAGGCACCTGGATT  |
| AKT1-94  | TCCAGACTTGTTCCCTCCTAAGTTCTAGTGATCTCATGCC | TCCAGACTTGTTCCCTCCTAAGTTCTAGTGATCTCATGCCATAATCGCTAGGCACCTGGATT |
| AKT1-95  | CCCCTCAGATGAAGCAGTTGCCTAATTAGTAAGTTCCCT  | CCCCTCAGATGAAGCAGTTGCCTAATTAGTAAGTTCCCTATAATCGCTAGGCACCTGGATT  |
| AKT1-96  | CATAGACCATGAACGAGTTTGAGTACCTGAAGCTGCTGG  | CATAGACCATGAACGAGTTTGAGTACCTGAAGCTGCTGGATAATCGCTAGGCACCTGGATT  |
| AKT1-97  | TCACCTTATAGTCACCCTTCATCCTGGGTCATTGAGAGT  | TCACCTTATAGTCACCCTTCATCCTGGGTCATTGAGAGTATAATCGCTAGGCACCTGGATT  |
| AKT1-98  | AAAATAAAGTTATCACCTCCTGGTAGCAGGGAGGGTCTCT | AAAATAAAGTTATCACCTCCTGGTAGCAGGGAGGGTCTCTATAATCGCTAGGCACCTGGATT |
| AKT1-99  | TACACGAAACATGACACAGTAAATGATGTTCCGAGGGTGA | TACACGAAACATGACACAGTAAATGATGTTCCGAGGGTGAATAATCGCTAGGCACCTGGATT |
| AKT1-100 | AGCATTGCTGAAAGTAACCAAGGTATGGAAATGGTCAGGC | AGCATTGCTGAAAGTAACCAAGGTATGGAAATGGTCAGGCATAATCGCTAGGCACCTGGATT |
| AKT1_488 | /5Alex488N/AATCCAGGTGCCTAGCGATT          |                                                                |
| CDH1-1   | GCCCTCTCTGGTTACTGGGCTGTGGCT              | GCCCTCTCTGGTTACTGGGCTGTGGCTTATGTGCGGCATTGACTAAGAG              |
| CDH1-2   | AGAGCAAGGCAGGGGCTAGAAACAAGCTTGT          | AGAGCAAGGCAGGGGCTAGAAACAAGCTTGTATGTGCGGCATTGACTAAGAG           |
| CDH1-3   | ATCTGAGCATGCGTCTGGGGTGTCCCA              | ATCTGAGCATGCGTCTGGGGTGTCCCATATGTGCGGCATTGACTAAGAG              |
| CDH1-4   | GGGGACCCTGGGACTGGTGATTTAGTGGG            | GGGGACCCTGGGACTGGTGATTTAGTGGGTATGTGCGGCATTGACTAAGAG            |
| CDH1-5   | TCCTTTGCTTGCTCTGCAATCTGGCCTTGG           | TCCTTTGCTTGCTCTGCAATCTGGCCTTGGTATGTGCGGCATTGACTAAGAG           |
| CDH1-6   | AAAGAAGACCAGTGGGCCGCCCTCT                | AAAGAAGACCAGTGGGCCGCCCTCTTATGTGCGGCATTGACTAAGAG                |
| CDH1-7   | AAGGCCATGTAAAGAAGGCAGGCTGCTGC            | AAGGCCATGTAAAGAAGGCAGGCTGCTGCTATGTGCGGCATTGACTAAGAG            |

|         |                                 |                                                        |
|---------|---------------------------------|--------------------------------------------------------|
| CDH1-8  | GCACCTGTCCCAATCCAATCCTTGCTGGG   | GCACCTGTCCCAATCCAATCCTTGCTGGGTATGTGCGGCATTGACTAAGAG    |
| CDH1-9  | AGGCTAGACCCTGAGGTTACGGCAGATTGGA | AGGCTAGACCCTGAGGTTACGGCAGATTGGATATGTGCGGCATTGACTAAGAG  |
| CDH1-10 | GGGCAGGCAGGGAGATCTCAAACCTGAGT   | GGGCAGGCAGGGAGATCTCAAACCTGAGTTATGTGCGGCATTGACTAAGAG    |
| CDH1-11 | GCTCCCTCTCACCCAGCAAACCAGCC      | GCTCCCTCTCACCCAGCAAACCAGCCTATGTGCGGCATTGACTAAGAG       |
| CDH1-12 | GGGTGGACCGGAACGGGTTTGTGTGG      | GGGTGGACCGGAACGGGTTTGTGTGGTATGTGCGGCATTGACTAAGAG       |
| CDH1-13 | CAGAGGTTGCACTGCTTGCCACCAAGTCAC  | CAGAGGTTGCACTGCTTGCCACCAAGTCACTATGTGCGGCATTGACTAAGAG   |
| CDH1-14 | GCTCAGGACCCCGTGGGATAATTGGCCA    | GCTCAGGACCCCGTGGGATAATTGGCCATATGTGCGGCATTGACTAAGAG     |
| CDH1-15 | TTTGCTTAAATGTCACTCCCGCCCTCAGGGA | TTTGCTTAAATGTCACTCCCGCCCTCAGGGATATGTGCGGCATTGACTAAGAG  |
| CDH1-16 | AAAATTATTTGGCAGGGGCAGGGCACGGT   | AAAATTATTTGGCAGGGGCAGGGCACGGTTATGTGCGGCATTGACTAAGAG    |
| CDH1-17 | AGTGGGAGAGCCTGGCCGTATGTCTGG     | AGTGGGAGAGCCTGGCCGTATGTCTGGTATGTGCGGCATTGACTAAGAG      |
| CDH1-18 | CAAGCCCTCTGCTAGGCATTGGGGATGC    | CAAGCCCTCTGCTAGGCATTGGGGATGCTATGTGCGGCATTGACTAAGAG     |
| CDH1-19 | GCCCTGAGTCACCGACATTGAGAGGCCT    | GCCCTGAGTCACCGACATTGAGAGGCCTTATGTGCGGCATTGACTAAGAG     |
| CDH1-20 | TGCTTCCAGTGCCTGGTACGTAGCAACCA   | TGCTTCCAGTGCCTGGTACGTAGCAACCATATGTGCGGCATTGACTAAGAG    |
| CDH1-21 | GGGGCGGGTAGTGTAAAGTGTCAAAGGAGCC | GGGGCGGGTAGTGTAAAGTGTCAAAGGAGCCTATGTGCGGCATTGACTAAGAG  |
| CDH1-22 | TCATGCCAAGGTCCACCCATGCAGCC      | TCATGCCAAGGTCCACCCATGCAGCCTATGTGCGGCATTGACTAAGAG       |
| CDH1-23 | TTCCGCACAGTGTGTGAGTGCCTTCTGTGT  | TTCCGCACAGTGTGTGAGTGCCTTCTGTGTTATGTGCGGCATTGACTAAGAG   |
| CDH1-24 | GGGGATGCCCCAAGCCTAGAGAGGTGG     | GGGGATGCCCCAAGCCTAGAGAGGTGGTATGTGCGGCATTGACTAAGAG      |
| CDH1-25 | TGGCAGGACTGCAGAAGGACAATAGTGTGGC | TGGCAGGACTGCAGAAGGACAATAGTGTGGCTATGTGCGGCATTGACTAAGAG  |
| CDH1-26 | TGGTTGGGTGAGGCCCTTTTGGCCTG      | TGGTTGGGTGAGGCCCTTTTGGCCTGTATGTGCGGCATTGACTAAGAG       |
| CDH1-27 | AGGGGAGGGCGTTCTAGATGGAGGGAACA   | AGGGGAGGGCGTTCTAGATGGAGGGAACATATGTGCGGCATTGACTAAGAG    |
| CDH1-28 | CCTCTGGTCCTTTAGCCCAGATCCACCGG   | CCTCTGGTCCTTTAGCCCAGATCCACCGGTATGTGCGGCATTGACTAAGAG    |
| CDH1-29 | TTTCCAATGGCGCTGCTGGCTCTGGC      | TTTCCAATGGCGCTGCTGGCTCTGGCTATGTGCGGCATTGACTAAGAG       |
| CDH1-30 | CCCCAGCATTAAAGCCTGGCATGTAGTTGCC | CCCCAGCATTAAAGCCTGGCATGTAGTTGCCATATGTGCGGCATTGACTAAGAG |
| CDH1-31 | GGGAGGATTAGGCTGCAGGGTTACCCCA    | GGGAGGATTAGGCTGCAGGGTTACCCCATATGTGCGGCATTGACTAAGAG     |
| CDH1-32 | CAGGAGCCTTGGGAGTGGGTTTACACCTCAA | CAGGAGCCTTGGGAGTGGGTTTACACCTCAATATGTGCGGCATTGACTAAGAG  |
| CDH1-33 | AGCAACTCAGTGGTGGAGGAGGGATTCCAGT | AGCAACTCAGTGGTGGAGGAGGGATTCCAGTTATGTGCGGCATTGACTAAGAG  |
| CDH1-34 | TTCCCTTCTTGAGAAAAGTGGCCAGGCT    | TTCCCTTCTTGAGAAAAGTGGCCAGGCTTATGTGCGGCATTGACTAAGAG     |
| CDH1-35 | CTGGGCCTGTCTTCCACAAGACATCGCCT   | CTGGGCCTGTCTTCCACAAGACATCGCCTTATGTGCGGCATTGACTAAGAG    |

|         |                                 |                                                        |
|---------|---------------------------------|--------------------------------------------------------|
| CDH1-36 | GCAGCACATAGAGGGCCCTTAGGGGATGT   | GCAGCACATAGAGGGCCCTTAGGGGATGTTATGTGCGGCATTGACTAAGAG    |
| CDH1-37 | TTCAGGTGGGTACCAGCCAGTTGACATCCAG | TTCAGGTGGGTACCAGCCAGTTGACATCCAGTATGTGCGGCATTGACTAAGAG  |
| CDH1-38 | ACCAGCCTCGACCTTCAGGGAACGT       | ACCAGCCTCGACCTTCAGGGAACGTTATGTGCGGCATTGACTAAGAG        |
| CDH1-39 | AGTCAAACGGGGTAGGGAGTGCCTGGG     | AGTCAAACGGGGTAGGGAGTGCCTGGGTATGTGCGGCATTGACTAAGAG      |
| CDH1-40 | GTAGTGGTGCAGGGCCCTTTAGCTGAGG    | GTAGTGGTGCAGGGCCCTTTAGCTGAGGTATGTGCGGCATTGACTAAGAG     |
| CDH1-41 | CCATCAGCTTCCACCGAGACGAAGTGATGCA | CCATCAGCTTCCACCGAGACGAAGTGATGCATATGTGCGGCATTGACTAAGAG  |
| CDH1-42 | AACCAGACCGTGCAGCCAACTCCTGC      | AACCAGACCGTGCAGCCAACTCCTGCTATGTGCGGCATTGACTAAGAG       |
| CDH1-43 | AGTCCCAGGCAACTCAGACCTTCCCTGG    | AGTCCCAGGCAACTCAGACCTTCCCTGGTATGTGCGGCATTGACTAAGAG     |
| CDH1-44 | TGGAGAAGGTGGGTGTTTTGTGTGTTCCCGT | TGGAGAAGGTGGGTGTTTTGTGTGTTCCCGTATGTGCGGCATTGACTAAGAG   |
| CDH1-45 | ATGAGCCACCGTGAATGGCCAGAAGCAC    | ATGAGCCACCGTGAATGGCCAGAAGCACTATGTGCGGCATTGACTAAGAG     |
| CDH1-46 | TGGTGTCTTGCCTTTGGTTTGCCTAAGGCC  | TGGTGTCTTGCCTTTGGTTTGCCTAAGGCCATATGTGCGGCATTGACTAAGAG  |
| CDH1-47 | CCAGTGATTCCACGTGGTCTGCCCTATGT   | CCAGTGATTCCACGTGGTCTGCCCTATGTTATGTGCGGCATTGACTAAGAG    |
| CDH1-48 | GGTGGCCTTTCAGGTTTTGTGAGGGCCA    | GGTGGCCTTTCAGGTTTTGTGAGGGCCATATGTGCGGCATTGACTAAGAG     |
| CDH1-49 | TGGTCAGACATCAACACCGCCTGCCTCA    | TGGTCAGACATCAACACCGCCTGCCTCATATGTGCGGCATTGACTAAGAG     |
| CDH1-50 | GGCTTGACTGAGATGCCCCAGTGGCTTG    | GGCTTGACTGAGATGCCCCAGTGGCTTGTATGTGCGGCATTGACTAAGAG     |
| CDH1-51 | TGTGTGCTGTTATAGCTACGTGGCCTTGGGC | TGTGTGCTGTTATAGCTACGTGGCCTTGGGCTATGTGCGGCATTGACTAAGAG  |
| CDH1-52 | GGGGTGTGGAGGGAGGCTGGAGAATGA     | GGGGTGTGGAGGGAGGCTGGAGAATGATATGTGCGGCATTGACTAAGAG      |
| CDH1-53 | AAGGGAGGCAACTGAGGCCACAGTGTCT    | AAGGGAGGCAACTGAGGCCACAGTGTCTTATGTGCGGCATTGACTAAGAG     |
| CDH1-54 | CAGCCACCACCCTGGATTGGCTTCCAAC    | CAGCCACCACCCTGGATTGGCTTCCAACATATGTGCGGCATTGACTAAGAG    |
| CDH1-55 | TCCAGGGTGTGGCTGAGCAGAGCAAGT     | TCCAGGGTGTGGCTGAGCAGAGCAAGTATGTGCGGCATTGACTAAGAG       |
| CDH1-56 | GAGGCTTGTATGGCCTGACCGAGGTTGT    | GAGGCTTGTATGGCCTGACCGAGGTTGTATGTGCGGCATTGACTAAGAG      |
| CDH1-57 | TGCCTCCGCTTCATTCTCCACCCTCCT     | TGCCTCCGCTTCATTCTCCACCCTCCTATGTGCGGCATTGACTAAGAG       |
| CDH1-58 | CCACACACCCGAGCACTCATTTTAACCC    | CCACACACCCGAGCACTCATTTTAACCCCTATGTGCGGCATTGACTAAGAG    |
| CDH1-59 | GGGGCGTTCAGGAGGCTACAGCCTAGT     | GGGGCGTTCAGGAGGCTACAGCCTAGTATGTGCGGCATTGACTAAGAG       |
| CDH1-60 | CCCCTCCCTCTCCCATCATGTGTGGGT     | CCCCTCCCTCTCCCATCATGTGTGGGTATGTGCGGCATTGACTAAGAG       |
| CDH1-61 | ACCACTGCTGGAACAGGTGCCCATCT      | ACCACTGCTGGAACAGGTGCCCATCTATGTGCGGCATTGACTAAGAG        |
| CDH1-62 | GATTACAGGGTTGAGCCTGCACCTGACCCT  | GATTACAGGGTTGAGCCTGCACCTGACCCTATGTGCGGCATTGACTAAGAG    |
| CDH1-63 | TGGAATTTCTCTCCCTCCGCAAGCCTAGTGC | TGGAATTTCTCTCCCTCCGCAAGCCTAGTGCATATGTGCGGCATTGACTAAGAG |

|         |                                 |                                                       |
|---------|---------------------------------|-------------------------------------------------------|
| CDH1-64 | GGGGCGAATGTTCTTCAGAGGCTGACCT    | GGGGCGAATGTTCTTCAGAGGCTGACCTTATGTGCGGCATTGACTAAGAG    |
| CDH1-65 | AGGCTGGTCTTGACGGGACTTGGACTCAAG  | AGGCTGGTCTTGACGGGACTTGGACTCAAGTATGTGCGGCATTGACTAAGAG  |
| CDH1-66 | GGGCCAGGACTTGTCTCCACATCTCA      | GGGCCAGGACTTGTCTCCACATCTCATATGTGCGGCATTGACTAAGAG      |
| CDH1-67 | GCTGTGTTGTTACGCATGCAGCCACAGCT   | GCTGTGTTGTTACGCATGCAGCCACAGCTTATGTGCGGCATTGACTAAGAG   |
| CDH1-68 | AACCCAGCTTCTCCAGTCAAGGCAGCA     | AACCCAGCTTCTCCAGTCAAGGCAGCATATGTGCGGCATTGACTAAGAG     |
| CDH1-69 | GGCCCGCAGGAGCAAGAGCTAACCTTTCT   | GGCCCGCAGGAGCAAGAGCTAACCTTTCTTATGTGCGGCATTGACTAAGAG   |
| CDH1-70 | AGCCAGTACGCCCTGCGACTGACT        | AGCCAGTACGCCCTGCGACTGACTTATGTGCGGCATTGACTAAGAG        |
| CDH1-71 | AAGGGGACTTTGCTCCCTGCTTCCCATCC   | AAGGGGACTTTGCTCCCTGCTTCCCATCTATGTGCGGCATTGACTAAGAG    |
| CDH1-72 | TGGTGAGTCTGGCGGCTAAGTAGCATCAGA  | TGGTGAGTCTGGCGGCTAAGTAGCATCAGATATGTGCGGCATTGACTAAGAG  |
| CDH1-73 | CCTTTGTATGCAGGGTGGGCAAAACTGCT   | CCTTTGTATGCAGGGTGGGCAAAACTGCTTATGTGCGGCATTGACTAAGAG   |
| CDH1-74 | CTTGCCAGCGTGACAGTGAGCTTCCAG     | CTTGCCAGCGTGACAGTGAGCTTCCAGTATGTGCGGCATTGACTAAGAG     |
| CDH1-75 | ATTTGCTAAGGCCACCCAGCAAGAACATGGC | ATTTGCTAAGGCCACCCAGCAAGAACATGGCTATGTGCGGCATTGACTAAGAG |
| CDH1-76 | TTTTCTCTGGCAAGGGCAGGGCTATTGGCT  | TTTTCTCTGGCAAGGGCAGGGCTATTGGCTTATGTGCGGCATTGACTAAGAG  |
| CDH1-77 | GGGGACAAATCAGCCAAGTTGAGGGCTCT   | GGGGACAAATCAGCCAAGTTGAGGGCTTATGTGCGGCATTGACTAAGAG     |
| CDH1-78 | TGGATGGATGTCTGCCTGGGTTCTTGGA    | TGGATGGATGTCTGCCTGGGTTCTTGGCATATGTGCGGCATTGACTAAGAG   |
| CDH1-79 | AAAACCTCAGCACAGTGAGTCTTGCCAGGCA | AAAACCTCAGCACAGTGAGTCTTGCCAGGCATATGTGCGGCATTGACTAAGAG |
| CDH1-80 | TTTTGCTCCGCATCTCAGCACATGACCT    | TTTTGCTCCGCATCTCAGCACATGACCTTATGTGCGGCATTGACTAAGAG    |
| CDH1-81 | TGGGGACGCTGTCTGGCTAGGTTGGA      | TGGGGACGCTGTCTGGCTAGGTTGGATATGTGCGGCATTGACTAAGAG      |
| CDH1-82 | CCATGTCCCCTCCTTTATCCCTCAGGGCAG  | CCATGTCCCCTCCTTTATCCCTCAGGGCAGTATGTGCGGCATTGACTAAGAG  |
| CDH1-83 | TCACCACTGGGCTGGACCGAGAGGTC      | TCACCACTGGGCTGGACCGAGAGGTCATATGTGCGGCATTGACTAAGAG     |
| CDH1-84 | CTACCGAACCCAGCGACATCTGAAGAGCCC  | CTACCGAACCCAGCGACATCTGAAGAGCCCTATGTGCGGCATTGACTAAGAG  |
| CDH1-85 | GCTGCTGCCTCAGTGGACTCCAGGAGA     | GCTGCTGCCTCAGTGGACTCCAGGAGATATGTGCGGCATTGACTAAGAG     |
| CDH1-86 | CCCCTGTCTGGTATGAGGGGTGCTCTGTG   | CCCCTGTCTGGTATGAGGGGTGCTCTGTGTATGTGCGGCATTGACTAAGAG   |
| CDH1-87 | CCCCAGAGGATGACACCCGGGACAACG     | CCCCAGAGGATGACACCCGGGACAACGTATGTGCGGCATTGACTAAGAG     |
| CDH1-88 | ACTCGTAACGACGTTGCACCAACCCTCATGA | ACTCGTAACGACGTTGCACCAACCCTCATGATATGTGCGGCATTGACTAAGAG |
| CDH1-89 | ATGGTCCAGTGGCCCTCGGTGAGTCTTC    | ATGGTCCAGTGGCCCTCGGTGAGTCTTCTATGTGCGGCATTGACTAAGAG    |
| CDH1-90 | TGGCAGCCCCACTCTGATCTATGGGGAC    | TGGCAGCCCCACTCTGATCTATGGGGACTATGTGCGGCATTGACTAAGAG    |
| CDH1-91 | GGTGTGCCACAAGTCTGGGTGCATTGTCG   | GGTGTGCCACAAGTCTGGGTGCATTGTCGATATGTGCGGCATTGACTAAGAG  |

|           |                                         |                                                               |
|-----------|-----------------------------------------|---------------------------------------------------------------|
| CDH1-92   | CGAGGACGACTAGGGGACTCGAGAGAGGC           | CGAGGACGACTAGGGGACTCGAGAGAGGCTATGTGCGGCATTGACTAAGAG           |
| CDH1-93   | TGGCCTCAGTCAAACCGTGGAGAAAGAGGCC         | TGGCCTCAGTCAAACCGTGGAGAAAGAGGCCCTATGTGCGGCATTGACTAAGAG        |
| CDH1--94  | AGGAGTATCCCGTTTTACAGTTGAGCAAACCGAGGC    | AGGAGTATCCCGTTTTACAGTTGAGCAAACCGAGGCTATGTGCGGCATTGACTAAGAG    |
| CDH1--95  | TAAGAGAGTGACGTCCACTTGCTCAGGGTCAGC       | TAAGAGAGTGACGTCCACTTGCTCAGGGTCAGCTATGTGCGGCATTGACTAAGAG       |
| CDH1--96  | AGAGCAGATATCTGAACTGGGATCTGACTCCCAGGC    | AGAGCAGATATCTGAACTGGGATCTGACTCCCAGGCTATGTGCGGCATTGACTAAGAG    |
| CDH1--97  | CCCATTAAGCACCATCTCTGGGATGACTGAAGAGCA    | CCCATTAAGCACCATCTCTGGGATGACTGAAGAGCATATGTGCGGCATTGACTAAGAG    |
| CDH1--98  | CTGAGAGACTGTGCCTGGACCAAACATCTTGATACAGG  | CTGAGAGACTGTGCCTGGACCAAACATCTTGATACAGGTATGTGCGGCATTGACTAAGAG  |
| CDH1--99  | AGCAAGGGAAGGGGCTAGTTTCTCTTCTGGTTTCA     | AGCAAGGGAAGGGGCTAGTTTCTCTTCTGGTTTCAATATGTGCGGCATTGACTAAGAG    |
| CDH1--100 | TTGGATATTTGATGTCAGTGGGCATTGAGGAGTGGC    | TTGGATATTTGATGTCAGTGGGCATTGAGGAGTGGCTATGTGCGGCATTGACTAAGAG    |
| CDH1--101 | TTCTCGGGGAAGGCAAACCTTGATCCAGTCTTGG      | TTCTCGGGGAAGGCAAACCTTGATCCAGTCTTGGTATGTGCGGCATTGACTAAGAG      |
| CDH1--102 | GTGCTAAGGCTGGTGACTTTGTTTTCTGCACC        | GTGCTAAGGCTGGTGACTTTGTTTTCTGCACCTATGTGCGGCATTGACTAAGAG        |
| CDH1--103 | AAGATATTTGGTAGCACCAAGGGTGGGTTGGTCTGG    | AAGATATTTGGTAGCACCAAGGGTGGGTTGGTCTGGTATGTGCGGCATTGACTAAGAG    |
| CDH1--104 | AATAGTGACACGTATTCACTTTTGCCTCAGACTCTGGGG | AATAGTGACACGTATTCACTTTTGCCTCAGACTCTGGGGTATGTGCGGCATTGACTAAGAG |
| CDH1--105 | CCTCTGGTGTGGTTGGTTTCAGTCCCTTTATGTTAC    | CCTCTGGTGTGGTTGGTTTCAGTCCCTTTATGTTCACTATGTGCGGCATTGACTAAGAG   |
| CDH1--106 | TTTTGGACTGTGGGGTCTCCTTGATCAGTCCAATGT    | TTTTGGACTGTGGGGTCTCCTTGATCAGTCCAATGTTATGTGCGGCATTGACTAAGAG    |
| CDH1--107 | GATTTTAAAAGGCCGCTAGGACTTGGGATGTGGCC     | GATTTTAAAAGGCCGCTAGGACTTGGGATGTGGCCTATGTGCGGCATTGACTAAGAG     |
| CDH1--108 | TGACTCTCTTTGGACAGTGACGGAAGTGAAGGG       | TGACTCTCTTTGGACAGTGACGGAAGTGAAGGGTATGTGCGGCATTGACTAAGAG       |
| CDH1--109 | ATGGATGTAACATTGGCACCAGGTTTAGACATTGGCTTC | ATGGATGTAACATTGGCACCAGGTTTAGACATTGGCTTCTATGTGCGGCATTGACTAAGAG |
| CDH1--110 | TTTTGTGCACAGGCAGCTGTAGGGTCTTAACTCAG     | TTTTGTGCACAGGCAGCTGTAGGGTCTTAACTCAGTATGTGCGGCATTGACTAAGAG     |
| CDH1--111 | GGGACTTTGGAGTGTGGTCTAGGGTCATTCTCTGCT    | GGGACTTTGGAGTGTGGTCTAGGGTCATTCTCTGCTATGTGCGGCATTGACTAAGAG     |
| CDH1--112 | ATGCCTGGCTAATAACCCAGTCCCTTAGAGTTGCTGC   | ATGCCTGGCTAATAACCCAGTCCCTTAGAGTTGCTGCTATGTGCGGCATTGACTAAGAG   |



|               |                                         |                                                                  |
|---------------|-----------------------------------------|------------------------------------------------------------------|
| CDH1--<br>113 | AAAAGAAAAGCTGGCAGGCTTTCCAGTGATTGTTTTCT  | AAAAGAAAAGCTGGCAGGCTTTCCAGTGATTGTTTTCTATGTGCGGCATTGACTAAGAG      |
| CDH1--<br>114 | AAACACAGGGCCTATATTTTCAGTGTTGAGGTTTGGCTG | AAACACAGGGCCTATATTTTCAGTGTTGAGGTTTGGCTGTATGTGCGGCATTGACTAAGAG    |
| CDH1--<br>115 | TGAAGGATGTGCTGAACGTTTTAGAAAACAGTATGCAGC | TGAAGGATGTGCTGAACGTTTTAGAAAACAGTATGCAGCTATGTGCGGCATTGACTAAGAG    |
| CDH1--<br>116 | AAAAGCAAACCCAGAAACCAGCTTTGGGATCACCT     | AAAAGCAAACCCAGAAACCAGCTTTGGGATCACCTTATGTGCGGCATTGACTAAGAG        |
| CDH1--<br>117 | CCCCTACCCCTCAAACCTATAAAAGTCACTTCCCCA    | CCCCTACCCCTCAAACCTATAAAAGTCACTTCCCCATATGTGCGGCATTGACTAAGAG       |
| CDH1--<br>118 | ACTCATGTCTGTGACAAAGTTGATCTGAGCTTACTGGG  | ACTCATGTCTGTGACAAAGTTGATCTGAGCTTACTGGGTATGTGCGGCATTGACTAAGAG     |
| CDH1--<br>119 | GGTTATGGAAATCCCTGTTTGTCTCCAGGGCT        | GGTTATGGAAATCCCTGTTTGTCTCCAGGGCTTATGTGCGGCATTGACTAAGAG           |
| CDH1--<br>120 | GTCTGTTACACATTCCCTTCCAAGGTAGCCCCAGA     | GTCTGTTACACATTCCCTTCCAAGGTAGCCCCAGATATGTGCGGCATTGACTAAGAG        |
| CDH1--<br>121 | AGAAGCTGCCCAAACCTAAAATCCCCGAGAG         | AGAAGCTGCCCAAACCTAAAATCCCCGAGAGTATGTGCGGCATTGACTAAGAG            |
| CDH1--<br>122 | TATCCTGCCTCAGCTCTATCTCCTTTGAGGGCAC      | TATCCTGCCTCAGCTCTATCTCCTTTGAGGGCACTATGTGCGGCATTGACTAAGAG         |
| CDH1--<br>123 | CGGAACATACATGCCAATGGGCAGGAATGTAAAGAGAG  | CGGAACATACATGCCAATGGGCAGGAATGTAAAGAGAGTATGTGCGGCATTGACTAAGAG     |
| CDH1--<br>124 | TTTTCCCTCTCAAACCTCTATGGACTTGGTCCAGCCC   | TTTTCCCTCTCAAACCTCTATGGACTTGGTCCAGCCCTATGTGCGGCATTGACTAAGAG      |
| CDH1--<br>125 | TTAAGGTTGATTGTAATGGGCGGGGAAGAATTTGGTGG  | TTAAGGTTGATTGTAATGGGCGGGGAAGAATTTGGTGGTATGTGCGGCATTGACTAAGA<br>G |
| CDH1--<br>126 | GTTAGAACCTTCCATTATGCTCTGTGTGTGCTGGGG    | GTTAGAACCTTCCATTATGCTCTGTGTGTGCTGGGGTATGTGCGGCATTGACTAAGAG       |
| CDH1--<br>127 | ATACTGTGTTTCATAGCTTCCCTCTGAACAGCTGTGCA  | ATACTGTGTTTCATAGCTTCCCTCTGAACAGCTGTGCATATGTGCGGCATTGACTAAGAG     |
| CDH1--<br>128 | CTCCAATCCTCCACTTCTGCCAAGATTTGGGT        | CTCCAATCCTCCACTTCTGCCAAGATTTGGGTATGTGCGGCATTGACTAAGAG            |
| CDH1--<br>129 | AGCATGGAGACATCATAGGATGGTATGTCAAGCGTTCA  | AGCATGGAGACATCATAGGATGGTATGTCAAGCGTTCATATGTGCGGCATTGACTAAGAG     |
| CDH1--<br>130 | AAACCAGTTTCTTACCCTGCCTGCTTCTGTGT        | AAACCAGTTTCTTACCCTGCCTGCTTCTGTGTATGTGCGGCATTGACTAAGAG            |

|               |                                         |                                                                   |
|---------------|-----------------------------------------|-------------------------------------------------------------------|
| CDH1--<br>131 | TAAGCAAACAGTGCACTGCAAACAGTGACTAAGCCT    | TAAGCAAACAGTGCACTGCAAACAGTGACTAAGCCTTATGTGCGGCATTGACTAAGAG        |
| CDH1--<br>132 | AAAATCAAATCACCTAGGGCACTTCATGCAGACTTGCC  | AAAATCAAATCACCTAGGGCACTTCATGCAGACTTGCCCTATGTGCGGCATTGACTAAGAG     |
| CDH1--<br>133 | CTCTTGACAGATTCACTGAGAGCCAATCTCCAAGGGT   | CTCTTGACAGATTCACTGAGAGCCAATCTCCAAGGGTTATGTGCGGCATTGACTAAGAG       |
| CDH1--<br>134 | ATTGAGAACTCTATGGATGCAAGGAGGGGTGGATGG    | ATTGAGAACTCTATGGATGCAAGGAGGGGTGGATGGTATGTGCGGCATTGACTAAGAG        |
| CDH1--<br>135 | CCCCTACACTCAGGGAGATTCCAGAAAATCTCCAAGAGA | CCCCTACACTCAGGGAGATTCCAGAAAATCTCCAAGAGATATGTGCGGCATTGACTAAGAG     |
| CDH1--<br>136 | GACCTCTCAGCAGGTAATTCCAGTAGGCTCCAAGA     | GACCTCTCAGCAGGTAATTCCAGTAGGCTCCAAGATATGTGCGGCATTGACTAAGAG         |
| CDH1--<br>137 | CTTGATGAGTAAGAGGGTGTCTTCCATGCAAGGAAAGGG | CTTGATGAGTAAGAGGGTGTCTTCCATGCAAGGAAAGGGTATGTGCGGCATTGACTAAGA<br>G |
| CDH1--<br>138 | GTGGGTCATGGAGGGTTTTCTCTTTCTGGGCT        | GTGGGTCATGGAGGGTTTTCTCTTTCTGGGCTTATGTGCGGCATTGACTAAGAG            |
| CDH1--<br>139 | CACATCAGCGTTTAGAGACAGTCGGTCCCCTG        | CACATCAGCGTTTAGAGACAGTCGGTCCCCTGTATGTGCGGCATTGACTAAGAG            |
| CDH1--<br>140 | TCCCAGTGGAGGTTTTGAGAAAGAGGTTGGGAGA      | TCCCAGTGGAGGTTTTGAGAAAGAGGTTGGGAGATATGTGCGGCATTGACTAAGAG          |
| CDH1--<br>141 | ATGTTCTTTGGACCAACTGGAAACAGAGGAGAAAGA    | ATGTTCTTTGGACCAACTGGAAACAGAGGAGAAAGATATGTGCGGCATTGACTAAGA<br>G    |
| CDH1--<br>142 | TTTCAAAGGGGTATTTGGAATGTCAGCTCTGTGCTTG   | TTTCAAAGGGGTATTTGGAATGTCAGCTCTGTGCTTGTATGTGCGGCATTGACTAAGAG       |
| CDH1--<br>143 | CGCTTGACAGTTAATCCTCCCTGTAGTCCAAGGTGG    | CGCTTGACAGTTAATCCTCCCTGTAGTCCAAGGTGGTATGTGCGGCATTGACTAAGAG        |
| CDH1--<br>144 | AAAACCAGGTCTCTCATCCTGTTCCCTCTACTACTGT   | AAAACCAGGTCTCTCATCCTGTTCCCTCTACTACTGTTATGTGCGGCATTGACTAAGAG       |
| CDH1--<br>145 | CAGTTTCAGCCGGTTTCCCTCTTGACCTTCACT       | CAGTTTCAGCCGGTTTCCCTCTTGACCTTCACTTATGTGCGGCATTGACTAAGAG           |
| CDH1--<br>146 | TTCAAGACTTGGGAGTGTAGGGACAGGGAAACCG      | TTCAAGACTTGGGAGTGTAGGGACAGGGAAACCGTATGTGCGGCATTGACTAAGAG          |
| CDH1--<br>147 | GCTCTTGCTGCTGAAAGAGGGAAAGTTACTACTGGGA   | GCTCTTGCTGCTGAAAGAGGGAAAGTTACTACTGGGATATGTGCGGCATTGACTAAGAG       |
| CDH1--<br>148 | TGTTCCACATGAGCAAGATCATAAACGGTGGCCA      | TGTTCCACATGAGCAAGATCATAAACGGTGGCCATATGTGCGGCATTGACTAAGAG          |

|               |                                         |                                                               |
|---------------|-----------------------------------------|---------------------------------------------------------------|
| CDH1--<br>149 | GATTCTGTGGTTTGGCATTACAGGTACGCCTGTACA    | GATTCTGTGGTTTGGCATTACAGGTACGCCTGTACATATGTGCGGCATTGACTAAGAG    |
| CDH1--<br>150 | CATGACGCCAGCTGTTTCTCTATTCCAAAAGAGAAG    | CATGACGCCAGCTGTTTCTCTATTCCAAAAGAGAAGTATGTGCGGCATTGACTAAGAG    |
| CDH1--<br>151 | TTTCAGCATGTCTTCACCTTCATTGTGCGCAGCAGC    | TTTCAGCATGTCTTCACCTTCATTGTGCGCAGCAGCTATGTGCGGCATTGACTAAGAG    |
| CDH1--<br>152 | TTCCTTCTGGTCTCCCACTTATTCCTTCCCC         | TTCCTTCTGGTCTCCCACTTATTCCTTCCCCTATGTGCGGCATTGACTAAGAG         |
| CDH1--<br>153 | TTCCTCCAAGCCAGTCTTTTCTCCATCCATCAGTCA    | TTCCTCCAAGCCAGTCTTTTCTCCATCCATCAGTCATATGTGCGGCATTGACTAAGAG    |
| CDH1--<br>154 | GATCTGTCCTTTGACTCATGTACCTGGGGTCTCA      | GATCTGTCCTTTGACTCATGTACCTGGGGTCTCATATGTGCGGCATTGACTAAGAG      |
| CDH1--<br>155 | TCTCTTCCCACTCTTCTGCATGCTCACTTTGCC       | TCTCTTCCCACTCTTCTGCATGCTCACTTTGCCTATGTGCGGCATTGACTAAGAG       |
| CDH1--<br>156 | AGCTCACTCTTTTCTGTCCTGAAAAGACTGCAAGCC    | AGCTCACTCTTTTCTGTCCTGAAAAGACTGCAAGCCTATGTGCGGCATTGACTAAGAG    |
| CDH1--<br>157 | CCCCTATTTATGATAGTAAACCCTGCCCTCAGCCCT    | CCCCTATTTATGATAGTAAACCCTGCCCTCAGCCCTTATGTGCGGCATTGACTAAGAG    |
| CDH1--<br>158 | AAAGACAGGGCTTTATGTATTAGCCACAGAGAAGGGAGG | AAAGACAGGGCTTTATGTATTAGCCACAGAGAAGGGAGGTATGTGCGGCATTGACTAAGAG |
| CDH1--<br>159 | CATTTCTACCCACACTTCTGAGTGTAAGGAAGCACCA   | CATTTCTACCCACACTTCTGAGTGTAAGGAAGCACCATATGTGCGGCATTGACTAAGAG   |
| CDH1--<br>160 | GATCAAAATCTAGGCAGATATCTGAGCCCGCCAGAGC   | GATCAAAATCTAGGCAGATATCTGAGCCCGCCAGAGCTATGTGCGGCATTGACTAAGAG   |
| CDH1--<br>161 | CCCTGGGTATCTCAGCATCCTTCAGACCCATGA       | CCCTGGGTATCTCAGCATCCTTCAGACCCATGATATGTGCGGCATTGACTAAGAG       |
| CDH1--<br>162 | AAAAGCAAGGCCTGCTTAATCAGATCTCGGCCA       | AAAAGCAAGGCCTGCTTAATCAGATCTCGGCCATATGTGCGGCATTGACTAAGAG       |
| CDH1--<br>163 | TATGTTGAACTCTTCCCGTATGCCATCTCCTGTAACCC  | TATGTTGAACTCTTCCCGTATGCCATCTCCTGTAACCCATATGTGCGGCATTGACTAAGAG |
| CDH1--<br>164 | CAGGTGAAAGGGATGGATCATTCTTCTCTGAAGGTCT   | CAGGTGAAAGGGATGGATCATTCTTCTCTGAAGGTCTTATGTGCGGCATTGACTAAGAG   |
| CDH1--<br>165 | AAAACTATGCATTGGGGTGGAGAAATTTAGGGGCAGTC  | AAAACTATGCATTGGGGTGGAGAAATTTAGGGGCAGTCTATGTGCGGCATTGACTAAGAG  |
| CDH1--<br>166 | ATAGATGTTAGAACTGGACTGTGTCAGCTGGGTGTGG   | ATAGATGTTAGAACTGGACTGTGTCAGCTGGGTGTGGTATGTGCGGCATTGACTAAGAG   |

|               |                                         |                                                               |
|---------------|-----------------------------------------|---------------------------------------------------------------|
| CDH1--<br>167 | GCCAGGCCAGGCATTTTCTAGAGAAGGAATCCTG      | GCCAGGCCAGGCATTTTCTAGAGAAGGAATCCTGTATGTGCGGCATTGACTAAGAG      |
| CDH1--<br>168 | CACCCCTCAGCATGTTGCCCAAGAGGAATATTGC      | CACCCCTCAGCATGTTGCCCAAGAGGAATATTGCTATGTGCGGCATTGACTAAGAG      |
| CDH1--<br>169 | TTGGAATCTCACCTTCAGTACGAGGCTTCCTCCC      | TTGGAATCTCACCTTCAGTACGAGGCTTCCTCCCTATGTGCGGCATTGACTAAGAG      |
| CDH1--<br>170 | AAAAGGGAACAAGATGACCAACTTGTGGTGGGGA      | AAAAGGGAACAAGATGACCAACTTGTGGTGGGGATATGTGCGGCATTGACTAAGAG      |
| CDH1--<br>171 | CTGGGCACTTACTTTATGAACAGGTGGGGTGGG       | CTGGGCACTTACTTTATGAACAGGTGGGGTGGGTATGTGCGGCATTGACTAAGAG       |
| CDH1--<br>172 | ATAGTGACAGGTACTCTAGGTGCCGGCTTACTCA      | ATAGTGACAGGTACTCTAGGTGCCGGCTTACTCATATGTGCGGCATTGACTAAGAG      |
| CDH1--<br>173 | TAAGTCCCAGGAGATACTAGCCCTAGATCTCGTCTCTGT | TAAGTCCCAGGAGATACTAGCCCTAGATCTCGTCTCTGTTATGTGCGGCATTGACTAAGAG |
| CDH1--<br>174 | AGCTTCGTGCTAAAAGGTTTTGGAGAAATAACAGCTGCT | AGCTTCGTGCTAAAAGGTTTTGGAGAAATAACAGCTGCTTATGTGCGGCATTGACTAAGAG |
| CDH1--<br>175 | TGGTGACGTTTCATGTGGCTGGTTTCATTACCACC     | TGGTGACGTTTCATGTGGCTGGTTTCATTACCACCTATGTGCGGCATTGACTAAGAG     |
| CDH1--<br>176 | CTCACCTGTACAAAGGGGATAAACATAGCCCCTACCAC  | CTCACCTGTACAAAGGGGATAAACATAGCCCCTACCACTATGTGCGGCATTGACTAAGAG  |
| CDH1--<br>177 | AGTGCATGCTGATTGTGCCCGTGAATAGTTACTGC     | AGTGCATGCTGATTGTGCCCGTGAATAGTTACTGCTATGTGCGGCATTGACTAAGAG     |
| CDH1--<br>178 | ATCCTTCCTGTGCTCAGCGGCTCTATTTCTAAGAATGT  | ATCCTTCCTGTGCTCAGCGGCTCTATTTCTAAGAATGTTATGTGCGGCATTGACTAAGAG  |
| CDH1--<br>179 | TTCCATTCTAGATCCATCACTTTGGCCTAGAAAGGAGCC | TTCCATTCTAGATCCATCACTTTGGCCTAGAAAGGAGCCTATGTGCGGCATTGACTAAGAG |
| CDH1--<br>180 | GCTCTGTGTCAGTTACCAGCCTGTTTCCAGGAG       | GCTCTGTGTCAGTTACCAGCCTGTTTCCAGGAGTATGTGCGGCATTGACTAAGAG       |
| CDH1--<br>181 | TTTGGAGCTGACCCAGGGGTGATAGAAAACACTGG     | TTTGGAGCTGACCCAGGGGTGATAGAAAACACTGGTATGTGCGGCATTGACTAAGAG     |
| CDH1--<br>182 | TGTGAGAAAACCTCCCTCGTTGGTTCTTCTACAGGG    | TGTGAGAAAACCTCCCTCGTTGGTTCTTCTACAGGGTATGTGCGGCATTGACTAAGAG    |
| CDH1--<br>183 | AAGGCTAGCAAGCTGGGAGAACTTGAGAAACC        | AAGGCTAGCAAGCTGGGAGAACTTGAGAAACCTATGTGCGGCATTGACTAAGAG        |
| CDH1--<br>184 | GCCTGAGTGGTCTAGGCTGATACATCAGGCTTGG      | GCCTGAGTGGTCTAGGCTGATACATCAGGCTTGGTATGTGCGGCATTGACTAAGAG      |

|               |                                         |                                                                   |
|---------------|-----------------------------------------|-------------------------------------------------------------------|
| CDH1--<br>185 | CCCCACATGTTTATCCCAAATCCCCTTCTCCTCAAGC   | CCCCACATGTTTATCCCAAATCCCCTTCTCCTCAAGCTATGTGCGGCATTGACTAAGAG       |
| CDH1--<br>186 | TTGCTTCTAGGTGCCCATCTCACCCATCCTACC       | TTGCTTCTAGGTGCCCATCTCACCCATCCTACCTATGTGCGGCATTGACTAAGAG           |
| CDH1--<br>187 | AGGAAAGATGAATCGGAATGGAGCATTGCTGGGAAG    | AGGAAAGATGAATCGGAATGGAGCATTGCTGGGAAGTATGTGCGGCATTGACTAAGAG        |
| CDH1--<br>188 | TACTAGGGTGATCTGAGAAGGCCTCACTGAAGGGG     | TACTAGGGTGATCTGAGAAGGCCTCACTGAAGGGGTATGTGCGGCATTGACTAAGAG         |
| CDH1--<br>189 | CCATGTGACTAGGTAGGGAAGGGTGTCTAGACGG      | CCATGTGACTAGGTAGGGAAGGGTGTCTAGACGGTATGTGCGGCATTGACTAAGAG          |
| CDH1--<br>190 | GCAAAGACACCCCCTGACACTGAGCAGAAGG         | GCAAAGACACCCCCTGACACTGAGCAGAAGGTATGTGCGGCATTGACTAAGAG             |
| CDH1--<br>191 | GTACCCATCACCAGGACTTTGTCTTTCACTTGGGACT   | GTACCCATCACCAGGACTTTGTCTTTCACTTGGGACTTATGTGCGGCATTGACTAAGAG       |
| CDH1--<br>192 | GCCATCTTCGTTGTTGCTACCTCTAGGAAGCCTTCT    | GCCATCTTCGTTGTTGCTACCTCTAGGAAGCCTTCTTATGTGCGGCATTGACTAAGAG        |
| CDH1--<br>193 | GATACGTCCTACTCCTTCCCTTTGCCAGTTGGGA      | GATACGTCCTACTCCTTCCCTTTGCCAGTTGGGATATGTGCGGCATTGACTAAGAG          |
| CDH1--<br>194 | ACTCAGTGAGTAGTTTGATGAGGGGCTCTTTGCTGT    | ACTCAGTGAGTAGTTTGATGAGGGGCTCTTTGCTGTTATGTGCGGCATTGACTAAGAG        |
| CDH1--<br>195 | CCCCAGTGGAGGTGACTTATGTCCATCTTTTGGGG     | CCCCAGTGGAGGTGACTTATGTCCATCTTTTGGGGTATGTGCGGCATTGACTAAGAG         |
| CDH1--<br>196 | ACTTTTGCAGTGAGGGAGTGCATTATAATGGAGAGGAGG | ACTTTTGCAGTGAGGGAGTGCATTATAATGGAGAGGAGGTATGTGCGGCATTGACTAAGA<br>G |
| CDH1--<br>197 | AAAAGCCCCAAACCAGCTGAGCTTAGATGGATCTC     | AAAAGCCCCAAACCAGCTGAGCTTAGATGGATCTCTATGTGCGGCATTGACTAAGAG         |
| CDH1--<br>198 | GTGCCAGAAGAAAATCCCCACTCCCTACAATGTGTG    | GTGCCAGAAGAAAATCCCCACTCCCTACAATGTGTGTATGTGCGGCATTGACTAAGAG        |
| CDH1--<br>199 | GGGGAAGAAGTCCAATTTTCAGCTGGGAAAATGGGA    | GGGGAAGAAGTCCAATTTTCAGCTGGGAAAATGGGATATGTGCGGCATTGACTAAGAG        |
| CDH1_54<br>6  | /5Alex546N/CTCTTAGTCAATGCCGACA          |                                                                   |

581

582

583 **References**

- 584 1. Zhao, Y. *et al.* Nanoscale imaging of clinical specimens using pathology-optimized  
585 expansion microscopy. *Nat. Biotechnol.* **35**, 757–764 (2017).
- 586 2. Tillberg, P. W. *et al.* Protein-retention expansion microscopy of cells and tissues labeled  
587 using standard fluorescent proteins and antibodies. *Nat. Biotechnol.* **34**, 987–992 (2016).
- 588 3. Bucur, O. *et al.* Nanoscale imaging of clinical specimens using conventional and rapid-  
589 expansion pathology. *Nat. Protoc.* **15**, 1649–1672 (2020).
- 590 4. Ku, T. *et al.* Multiplexed and scalable super-resolution imaging of three-dimensional  
591 protein localization in size-adjustable tissues. *Nat Biotech* **34**, 973–981 (2016).
- 592 5. Susaki, E. A. *et al.* Whole-brain imaging with single-cell resolution using chemical  
593 cocktails and computational analysis. *Cell* **157**, 726–739 (2014).
- 594 6. Truckenbrodt, S. *et al.* X10 expansion microscopy enables 25-nm resolution on  
595 conventional microscopes. *EMBO Rep.* **19**, e45836 (2018).
- 596 7. Damstra, H. G. J. *et al.* Visualizing cellular and tissue ultrastructure using Ten-fold  
597 Robust Expansion Microscopy (TREx). *bioRxiv* 2021.02.03.428837 (2021).  
598 doi:10.1101/2021.02.03.428837
- 599 8. Ijdo, J. W., Wells, R. A., Baldini, A. & Reeders, S. T. Improved telomere detection using  
600 a telomere repeat probe (TTAGGG)<sub>n</sub> generated by PCR. *Nucleic Acids Res.* **19**, 4780  
601 (1991).
- 602 9. Suntronpong, A. *et al.* CENP-B box, a nucleotide motif involved in centromere formation,  
603 occurs in a New World monkey. *Biol. Lett.* **12**, (2016).
- 604 10. Dertinger, T. *et al.* Fast, background-free, 3D super-resolution optical fluctuation imaging  
605 (SOFI). *Proc. Natl. Acad. Sci. U. S. A.* **106**, 22287–22292 (2009).
- 606 11. Dertinger, T., Xu, J., Naini, O. F., Vogel, R. & Weiss, S. SOFI-based 3D superresolution  
607 sectioning with a widefield microscope. *Opt. Nanoscopy* **1**, 1–5 (2012).
- 608 12. Moser, F. *et al.* Cryo-SOFI enabling low-dose super-resolution correlative light and  
609 electron cryo-microscopy. *Proc. Natl. Acad. Sci. U. S. A.* **116**, 4804–4809 (2019).
- 610 13. Wijesekara, P. *et al.* Engineering rotating apical-out airway organoid for assessing  
611 respiratory cilia motility. *iScience* **25**, (2022). doi: 10.1016/j.isci.2022.104730
- 612 14. Hua, K. & Ferland, R. J. Fixation methods can differentially affect ciliary protein  
613 immunolabeling. *Cilia* **6**, 5 (2017).
- 614 15. Halpern, A. R., Howard, M. D. & Vaughan, J. C. Point by Point: An Introductory Guide to  
615 Sample Preparation for Single-Molecule, Super-Resolution Fluorescence Microscopy.  
616 *Curr. Protoc. Chem. Biol.* **7**, 103–120 (2015).
- 617 16. Ponjavić, I., Vukušić, K. & Tolić, I. M. Expansion microscopy of the mitotic spindle.  
618 *Methods Cell Biol.* **161**, 247–274 (2021).
- 619 17. Whelan, D. R. & Bell, T. D. M. Image artifacts in single molecule localization  
620 microscopy: Why optimization of sample preparation protocols matters. *Sci. Rep.* **5**, 1–10  
621 (2015).  
622
