# Supplementary material for: Magnify is a universal molecular anchoring strategy for expansion microscopy
Source: PubMed Central journal article supplement (PMC10264239; doi:10.1038/s41587-022-01546-1), 2023-01-02
Supplement: 41587_2022_1546_MOESM2_ESM.pdf [file 41587_2022_1546_MOESM2_ESM.pdf]

## Reporting Summary

Nature Portfolio wishes to improve the reproducibility of the work that we publish. This form provides structure for consistency and transparency in reporting. For further information on Nature Portfolio policies, see our [Editorial Policies](#) and the [Editorial Policy Checklist](#).

### Statistics

For all statistical analyses, confirm that the following items are present in the figure legend, table legend, main text, or Methods section.

n/a | Confirmed

- The exact sample size ( $n$ ) for each experimental group/condition, given as a discrete number and unit of measurement
- A statement on whether measurements were taken from distinct samples or whether the same sample was measured repeatedly
- The statistical test(s) used AND whether they are one- or two-sided  
*Only common tests should be described solely by name; describe more complex techniques in the Methods section.*
- A description of all covariates tested
- A description of any assumptions or corrections, such as tests of normality and adjustment for multiple comparisons
- A full description of the statistical parameters including central tendency (e.g. means) or other basic estimates (e.g. regression coefficient) AND variation (e.g. standard deviation) or associated estimates of uncertainty (e.g. confidence intervals)
- For null hypothesis testing, the test statistic (e.g.  $F$ ,  $t$ ,  $r$ ) with confidence intervals, effect sizes, degrees of freedom and  $P$  value noted  
*Give  $P$  values as exact values whenever suitable.*
- For Bayesian analysis, information on the choice of priors and Markov chain Monte Carlo settings
- For hierarchical and complex designs, identification of the appropriate level for tests and full reporting of outcomes
- Estimates of effect sizes (e.g. Cohen's  $d$ , Pearson's  $r$ ), indicating how they were calculated

*Our web collection on [statistics for biologists](#) contains articles on many of the points above.*

### Software and code

Policy information about [availability of computer code](#)

Data collection

Data analysis

For manuscripts utilizing custom algorithms or software that are central to the research but not yet described in published literature, software must be made available to editors and reviewers. We strongly encourage code deposition in a community repository (e.g. GitHub). See the Nature Portfolio [guidelines for submitting code & software](#) for further information.

### Data

Policy information about [availability of data](#)

All manuscripts must include a [data availability statement](#). This statement should provide the following information, where applicable:

- Accession codes, unique identifiers, or web links for publicly available datasets
- A description of any restrictions on data availability
- For clinical datasets or third party data, please ensure that the statement adheres to our [policy](#)

Sample data can be found at <https://github.com/zhao-biophotonics/MAGNIFY>. All other data can be provided upon reasonable request from the corresponding author.

## Human research participants

Policy information about [studies involving human research participants and Sex and Gender in Research](#).

|                             |                                                                                                                                                                                                                                                         |
|-----------------------------|---------------------------------------------------------------------------------------------------------------------------------------------------------------------------------------------------------------------------------------------------------|
| Reporting on sex and gender | We have only used human tissue sections for technical demonstration. As biological conclusions were not drawn, the population characteristics are not relevant for this study. FFPE sex/gender information can be obtained from the supplier, USBiomax. |
| Population characteristics  | We have only used human tissue for technical demonstration. As biological conclusions were not drawn, the population characteristics are not relevant for this study.                                                                                   |
| Recruitment                 | Human FFPE samples were commercially obtained from USBiomax and thus recruitment was not relevant for this study.                                                                                                                                       |
| Ethics oversight            | FFPE tissues were commercially obtained from USBiomax who collects human tissues under approved protocols.                                                                                                                                              |

Note that full information on the approval of the study protocol must also be provided in the manuscript.

## Field-specific reporting

Please select the one below that is the best fit for your research. If you are not sure, read the appropriate sections before making your selection.

Life sciences  Behavioural & social sciences  Ecological, evolutionary & environmental sciences

For a reference copy of the document with all sections, see [nature.com/documents/nr-reporting-summary-flat.pdf](https://www.nature.com/documents/nr-reporting-summary-flat.pdf)

## Life sciences study design

All studies must disclose on these points even when the disclosure is negative.

|                 |                                                                                                                                                                                                                                                                                                    |
|-----------------|----------------------------------------------------------------------------------------------------------------------------------------------------------------------------------------------------------------------------------------------------------------------------------------------------|
| Sample size     | No sample size calculation was performed. Experiments were repeated in triplicates at minimum, unless noted otherwise in the corresponding figure legend.                                                                                                                                          |
| Data exclusions | No data was excluded.                                                                                                                                                                                                                                                                              |
| Replication     | All reported data has been reproduced over at least 3 technical and/or biological replicates. ROIs from different parts of tissue sections across multiple sections were used for quantification of biomolecule retention. Sequential tissue sections were used for quantification of FFPE tissue. |
| Randomization   | Randomization was not necessary for this study.                                                                                                                                                                                                                                                    |
| Blinding        | Blinding was not necessary for this study. In most cases, experimental conditions were discernible from obtained image data.                                                                                                                                                                       |

## Reporting for specific materials, systems and methods

We require information from authors about some types of materials, experimental systems and methods used in many studies. Here, indicate whether each material, system or method listed is relevant to your study. If you are not sure if a list item applies to your research, read the appropriate section before selecting a response.

### Materials & experimental systems

| n/a                                 | Involved in the study                                           |
|-------------------------------------|-----------------------------------------------------------------|
| <input type="checkbox"/>            | <input checked="" type="checkbox"/> Antibodies                  |
| <input type="checkbox"/>            | <input checked="" type="checkbox"/> Eukaryotic cell lines       |
| <input checked="" type="checkbox"/> | <input type="checkbox"/> Palaeontology and archaeology          |
| <input type="checkbox"/>            | <input checked="" type="checkbox"/> Animals and other organisms |
| <input checked="" type="checkbox"/> | <input type="checkbox"/> Clinical data                          |
| <input checked="" type="checkbox"/> | <input type="checkbox"/> Dual use research of concern           |

### Methods

| n/a                                 | Involved in the study                           |
|-------------------------------------|-------------------------------------------------|
| <input checked="" type="checkbox"/> | <input type="checkbox"/> ChIP-seq               |
| <input checked="" type="checkbox"/> | <input type="checkbox"/> Flow cytometry         |
| <input checked="" type="checkbox"/> | <input type="checkbox"/> MRI-based neuroimaging |

## Antibodies

|                 |                                                                                      |
|-----------------|--------------------------------------------------------------------------------------|
| Antibodies used | See supplementary Tables 4-5<br>Primary Antibodies<br>Host Target Vendor Cat. Number |
|-----------------|--------------------------------------------------------------------------------------|

Chicken GFAP Abcam ab4674  
 Chicken GFP Abcam ab13970  
 Chicken NeuN Millipore ABN91  
 Chicken Tyrosine Hydroxylase Abcam ab76442  
 Chicken Vimentin Abcam ab24525  
 Goat PSD-95 Abcam ab12093  
 Goat CD4 R&D Systems AF-379-SP  
 Goat Talin-1 Novus AF5456-SP  
 Mouse Anti-Actin,  $\alpha$ -Smooth Muscle Sigma Aldrich A5228  
 Mouse  $\alpha$ -Tubulin Sigma Aldrich T6199  
 Mouse Bassoon Abcam ab82958  
 Mouse Cytokeratin Pan Type I/II Invitrogen MA5-13156  
 Mouse Synaptophysin Invitrogen MA1-213  
 Mouse CD11c Abcam ab11029  
 Mouse CD4 Origene UM870010  
 Mouse CD8 Invitrogen MA1-80231  
 Mouse CD8a (Alexa 488) Invitrogen 53-0008-82  
 Mouse VDAC1 Abcam ab14734  
 Rabbit  $\alpha$ -Tubulin Proteintech 11224-1-AP  
 Rabbit ACTN4 Sigma Aldrich HPA001873  
 Rabbit Alpha-Internexin (INA) Sigma Aldrich HPA008057  
 Rabbit Amyloid Precursor Protein (APP) Sigma Aldrich HPA001462  
 Rabbit Anti-ATPase Inhibitory Factor 1 (ATPIF1) Millipore ABC137  
 Rabbit Anti-ATPase Inhibitory Factor 1 (ATPIF1) Proteintech 12067-1-AP  
 Rabbit GABRA1 Proteintech 12410-1-AP  
 Rabbit GABRB1 Proteintech 20183-1-AP  
 Rabbit GluR2 Proteintech 11994-1-AP  
 Rabbit Synaptophysin Proteintech 17785-1-AP  
 Rabbit CCR5 Proteintech 17476-1-AP  
 Rabbit CD45 Abcam ab10558  
 Rabbit IL2 Proteintech 26156-1-AP  
 Rabbit IL-6 Proteintech 21865-1-AP  
 Rabbit TCR alpha Antibody Novus NBP2-52684  
 Wheat Germ Agglutinin (WGA) CF555 Biotium 29076  
 Wheat Germ Agglutinin (WGA) CF640R Biotium 29026  
 NHS-ATTO-488 Sigma Aldrich 41698  
 NHS-ATTO-532 Sigma Aldrich 88793  
 Succinimidyl Ester (NHS) CF 555 Biotium 92130  
 Cy3 NHS ester (non-sulfonated) Glpbio Tech. GC12618-25  
 Vybrant™ DiD cell-labeling solution Invitrogen V-22887  
 Vybrant™ DiO cell-labeling solution Invitrogen V-22886  
 Vybrant™ Dil cell-labeling solution Invitrogen V-22885  
 Lycopersicon Esculentum (Tomato) Lectin (LEL) Vector Labs DL-1174-1

#### Secondary Antibodies

Reactivity Host Conjugate Vendor Catalog Number  
 Rabbit Goat DyLight550 Invitrogen SA5-10033  
 Rabbit Goat CF555 Biotium 20232  
 Rabbit Goat Alexa Fluor 488 Invitrogen A11034  
 Rabbit Goat CF640R Biotium 20202  
 Rabbit Goat Fab Fragment AF488 Jackson Immuno 111-547-003  
 Rabbit Donkey CF488A Biotium 20015  
 Rabbit Donkey Fab Fragment AF488 Jackson Immuno 711-547-003  
 Mouse Goat Alexa Fluor 488 Invitrogen A11001  
 Mouse Goat CF568 Biotium 20301  
 Mouse Donkey CF555 Biotium 20037  
 Mouse Donkey CF640R Biotium 20177  
 Mouse Donkey Fab Fragment AF488 Jackson Immuno 715-547-003  
 Chicken Goat Alexa Fluor 488 Invitrogen A11039  
 Chicken Goat DyLight 488 Invitrogen SA5-10070  
 Chicken Goat DyLight 550 Invitrogen SA5-10033  
 Chicken Goat CF488A Biotium 20020  
 Chicken Goat CF555 Biotium 20034  
 Chicken Goat CF640 Biotium 20084  
 Goat Donkey CF647 Biotium 20829  
 Streptavidin CF 640 Biotium 292037

#### Validation

All validation data is available on the manufacturers' website. No further validation was performed.

## Eukaryotic cell lines

Policy information about [cell lines and Sex and Gender in Research](#)

#### Cell line source(s)

HEK-293FT cells were purchased from ThermoFisher Scientific, Bronchus-derived human airway basal stem cells (hABSCs)

|                                                                      |                                                                                                                                                                                                                                                                                                                                                                                                                                                                     |
|----------------------------------------------------------------------|---------------------------------------------------------------------------------------------------------------------------------------------------------------------------------------------------------------------------------------------------------------------------------------------------------------------------------------------------------------------------------------------------------------------------------------------------------------------|
| Cell line source(s)                                                  | were purchased from Lonza. Additional hABSCs were obtained from surgical excess of de-identified tissues of healthy lung donors or donors carrying variants in CCDC39 gene (c.830_831delCA [p.Thr277Argfs*3] and c.1871_1872delTA(p.Ile624Lysfs*3), IRB ID# 201103213 with permission of the institutional review board at Washington University in Saint Louis. The U2OS cells were purchased from ATCC and a gift from the Lee lab at Carnegie Mellon University. |
| Authentication                                                       | Cell lines were not authenticated.                                                                                                                                                                                                                                                                                                                                                                                                                                  |
| Mycoplasma contamination                                             | Cells were not tested for Mycoplasma contamination.                                                                                                                                                                                                                                                                                                                                                                                                                 |
| Commonly misidentified lines<br>(See <a href="#">ICLAC</a> register) | No commonly misidentified lines were used.                                                                                                                                                                                                                                                                                                                                                                                                                          |

## Animals and other research organisms

Policy information about [studies involving animals](#); [ARRIVE guidelines](#) recommended for reporting animal research, and [Sex and Gender in Research](#)

|                         |                                                                                                                                                                                                                                                                                                                                                                   |
|-------------------------|-------------------------------------------------------------------------------------------------------------------------------------------------------------------------------------------------------------------------------------------------------------------------------------------------------------------------------------------------------------------|
| Laboratory animals      | Male and female mice were used. C57BL/6 mice, SST-Cre mouse line: Jax 013044 crossed to Ai3 (Jax 007903), DAT-Cre mice with C57 background expressing AAV2/5-hSynapsin1-FLEX-axon-GCaMP6 and AAV5-Syn-FLEX-rc[ChrimsonR-tdTomato].                                                                                                                                |
| Wild animals            | No wild animals were used.                                                                                                                                                                                                                                                                                                                                        |
| Reporting on sex        | Sex was not relevant to this study.                                                                                                                                                                                                                                                                                                                               |
| Field-collected samples | No field collected samples were used.                                                                                                                                                                                                                                                                                                                             |
| Ethics oversight        | All experimental procedures involving animals were conducted in accordance with the NIH guidelines and were approved by the Institutional Animal Care and Use Committee at Carnegie Mellon University under the protocols AR202000020 (SST-Cre Mice) and PROTO201600011 (C57BL/6), and by Brown University Institutional Animal Care and Use Committee (DAT-Cre). |

Note that full information on the approval of the study protocol must also be provided in the manuscript.
